# Supplementary material for: Modelling earthquake rates and associated uncertainties in theMarmara Region, Turkey
Source: Copernicus journal article supplement (doi:10.5194/nhess-2020-387), 2021-02-18
Supplement: Supplementary file 1 [file Scoring.xlsx]

## Sheet: Logic_Tree_branches_results
ScL	Model	BG	bvalue	MFD	Sc	ID	sample	mean_sr	chi_score	NMS_score	paleo_score	rsqsim	Poids		Rsqsim_mfd	Rsqsim_Sc	Mmax_score
TMG2017_L_m	H3	bg_BG_1	bmin_1.14_bmax_1.16	MFD_GR	Set_1	TMG2017_L_mH3bg_BG_1bmin_1.14_bmax_1.16MFD_GRSet_1	sample_1	12.812	0.263	0	0.825	0.14	0		0.2	0.7	0.6
TMG2017_L_m	H3	bg_BG_1	bmin_1.14_bmax_1.16	MFD_GR	Set_1	TMG2017_L_mH3bg_BG_1bmin_1.14_bmax_1.16MFD_GRSet_1	sample_2	13.691	0.115	1	0.898	0.14	0.0144578		0.2	0.7	0.88
TMG2017_L_m	H3	bg_BG_1	bmin_1.14_bmax_1.16	MFD_GR	Set_1	TMG2017_L_mH3bg_BG_1bmin_1.14_bmax_1.16MFD_GRSet_1	sample_3	12.036	0.324	0	0.74	0.14	0		0.2	0.7	0.6
TMG2017_L_m	H3	bg_BG_1	bmin_1.14_bmax_1.16	MFD_GR	Set_1	TMG2017_L_mH3bg_BG_1bmin_1.14_bmax_1.16MFD_GRSet_1	sample_4	12.609	0.118	1	0.788	0.14	0.0130178		0.2	0.7	0.6
TMG2017_L_m	H3	bg_BG_1	bmin_1.14_bmax_1.16	MFD_GR	Set_1	TMG2017_L_mH3bg_BG_1bmin_1.14_bmax_1.16MFD_GRSet_1	sample_5	13.743	0.471	0	0.472	0.14	0		0.2	0.7	0.94
TMG2017_L_m	H3	bg_BG_1	bmin_1.14_bmax_1.16	MFD_GR	Set_1	TMG2017_L_mH3bg_BG_1bmin_1.14_bmax_1.16MFD_GRSet_1	sample_6	13.141	0.164	1	0.814	0.14	0.0186894		0.2	0.7	0.88
TMG2017_L_m	H3	bg_BG_1	bmin_1.14_bmax_1.16	MFD_GR	Set_1	TMG2017_L_mH3bg_BG_1bmin_1.14_bmax_1.16MFD_GRSet_1	sample_7	11.911	0.254	1	0.884	0.14	0.031435		0.2	0.7	0.6
TMG2017_L_m	H3	bg_BG_1	bmin_1.14_bmax_1.16	MFD_GR	Set_1	TMG2017_L_mH3bg_BG_1bmin_1.14_bmax_1.16MFD_GRSet_1	sample_8	13.672	0.107	1	0.877	0.14	0.0131375		0.2	0.7	0.6
TMG2017_L_m	H3	bg_BG_1	bmin_1.14_bmax_1.16	MFD_GR	Set_1	TMG2017_L_mH3bg_BG_1bmin_1.14_bmax_1.16MFD_GRSet_1	sample_9	13.68	0.101	1	0.501	0.14	0.00708414		0.2	0.7	0.6
TMG2017_L_m	H3	bg_BG_1	bmin_1.14_bmax_1.16	MFD_GR	Set_1	TMG2017_L_mH3bg_BG_1bmin_1.14_bmax_1.16MFD_GRSet_1	sample_10	13.103	0.12	0	0.844	0.14	0		0.2	0.7	0.6
TMG2017_L_m	H3	bg_BG_2	bmin_1.14_bmax_1.16	MFD_GR	Set_1	TMG2017_L_mH3bg_BG_2bmin_1.14_bmax_1.16MFD_GRSet_1	sample_1	12.812	0.303	0	0.8	0.14	0		0.2	0.7	0.6
TMG2017_L_m	H3	bg_BG_2	bmin_1.14_bmax_1.16	MFD_GR	Set_1	TMG2017_L_mH3bg_BG_2bmin_1.14_bmax_1.16MFD_GRSet_1	sample_2	13.667	0.242	1	0.873	0.14	0.0295772		0.2	0.7	0.6
TMG2017_L_m	H3	bg_BG_2	bmin_1.14_bmax_1.16	MFD_GR	Set_1	TMG2017_L_mH3bg_BG_2bmin_1.14_bmax_1.16MFD_GRSet_1	sample_3	11.89	0.766	1	0.576	0.14	0.0617702		0.2	0.7	0.94
TMG2017_L_m	H3	bg_BG_2	bmin_1.14_bmax_1.16	MFD_GR	Set_1	TMG2017_L_mH3bg_BG_2bmin_1.14_bmax_1.16MFD_GRSet_1	sample_4	11.867	0.398	0	0.769	0.14	0		0.2	0.7	0.6
TMG2017_L_m	H3	bg_BG_2	bmin_1.14_bmax_1.16	MFD_GR	Set_1	TMG2017_L_mH3bg_BG_2bmin_1.14_bmax_1.16MFD_GRSet_1	sample_5	13.216	0.33	1	0.753	0.14	0.0347886		0.2	0.7	0.6
TMG2017_L_m	H3	bg_BG_2	bmin_1.14_bmax_1.16	MFD_GR	Set_1	TMG2017_L_mH3bg_BG_2bmin_1.14_bmax_1.16MFD_GRSet_1	sample_6	13.696	0.253	0	0.776	0.14	0		0.2	0.7	0.32
TMG2017_L_m	H3	bg_BG_2	bmin_1.14_bmax_1.16	MFD_GR	Set_1	TMG2017_L_mH3bg_BG_2bmin_1.14_bmax_1.16MFD_GRSet_1	sample_7	13.701	0.347	1	0.75	0.14	0.036435		0.2	0.7	0.6
TMG2017_L_m	H3	bg_BG_2	bmin_1.14_bmax_1.16	MFD_GR	Set_1	TMG2017_L_mH3bg_BG_2bmin_1.14_bmax_1.16MFD_GRSet_1	sample_8	13.113	0.295	0	0.811	0.14	0		0.2	0.7	0.6
TMG2017_L_m	H3	bg_BG_2	bmin_1.14_bmax_1.16	MFD_GR	Set_1	TMG2017_L_mH3bg_BG_2bmin_1.14_bmax_1.16MFD_GRSet_1	sample_9	11.903	0.335	0	0.453	0.14	0		0.2	0.7	0.6
TMG2017_L_m	H3	bg_BG_2	bmin_1.14_bmax_1.16	MFD_GR	Set_1	TMG2017_L_mH3bg_BG_2bmin_1.14_bmax_1.16MFD_GRSet_1	sample_10	13.088	0.291	1	0.877	0.14	0.035729		0.2	0.7	0.6
TMG2017_L_m	H3	bg_BG_3	bmin_1.14_bmax_1.16	MFD_GR	Set_1	TMG2017_L_mH3bg_BG_3bmin_1.14_bmax_1.16MFD_GRSet_1	sample_1	12.812	0.199	0	0.777	0.14	0		0.2	0.7	0.6
TMG2017_L_m	H3	bg_BG_3	bmin_1.14_bmax_1.16	MFD_GR	Set_1	TMG2017_L_mH3bg_BG_3bmin_1.14_bmax_1.16MFD_GRSet_1	sample_2	12.478	0.067	1	0.807	0.14	0.00756966		0.2	0.7	0.6
TMG2017_L_m	H3	bg_BG_3	bmin_1.14_bmax_1.16	MFD_GR	Set_1	TMG2017_L_mH3bg_BG_3bmin_1.14_bmax_1.16MFD_GRSet_1	sample_3	13.068	0.139	0	0.805	0.14	0		0.2	0.7	0.6
TMG2017_L_m	H3	bg_BG_3	bmin_1.14_bmax_1.16	MFD_GR	Set_1	TMG2017_L_mH3bg_BG_3bmin_1.14_bmax_1.16MFD_GRSet_1	sample_4	13.717	0.071	1	0.869	0.14	0.00863786		0.2	0.7	0.32
TMG2017_L_m	H3	bg_BG_3	bmin_1.14_bmax_1.16	MFD_GR	Set_1	TMG2017_L_mH3bg_BG_3bmin_1.14_bmax_1.16MFD_GRSet_1	sample_5	13.717	0.033	1	0.864	0.14	0.00399168		0.2	0.7	0.32
TMG2017_L_m	H3	bg_BG_3	bmin_1.14_bmax_1.16	MFD_GR	Set_1	TMG2017_L_mH3bg_BG_3bmin_1.14_bmax_1.16MFD_GRSet_1	sample_6	13.77	0.169	1	0.876	0.14	0.0207262		0.2	0.7	0.32
TMG2017_L_m	H3	bg_BG_3	bmin_1.14_bmax_1.16	MFD_GR	Set_1	TMG2017_L_mH3bg_BG_3bmin_1.14_bmax_1.16MFD_GRSet_1	sample_7	13.717	0.082	0	0.739	0.14	0		0.2	0.7	0.6
TMG2017_L_m	H3	bg_BG_3	bmin_1.14_bmax_1.16	MFD_GR	Set_1	TMG2017_L_mH3bg_BG_3bmin_1.14_bmax_1.16MFD_GRSet_1	sample_8	13.039	0.267	1	0.836	0.14	0.0312497		0.2	0.7	0.88
TMG2017_L_m	H3	bg_BG_3	bmin_1.14_bmax_1.16	MFD_GR	Set_1	TMG2017_L_mH3bg_BG_3bmin_1.14_bmax_1.16MFD_GRSet_1	sample_9	13.71	0.079	1	0.82	0.14	0.0090692		0.2	0.7	0.32
TMG2017_L_m	H3	bg_BG_3	bmin_1.14_bmax_1.16	MFD_GR	Set_1	TMG2017_L_mH3bg_BG_3bmin_1.14_bmax_1.16MFD_GRSet_1	sample_10	13.081	0.128	0	0.517	0.14	0		0.2	0.7	0.6
TMG2017_L_m	H3	bg_BG_1	bmin_1.14_bmax_1.16	MFD_double_GR	Set_1	TMG2017_L_mH3bg_BG_1bmin_1.14_bmax_1.16MFD_double_GRSet_1	sample_1	12.812	0.244	0	0.828	0.56	0		0.8	0.7	0.6
TMG2017_L_m	H3	bg_BG_1	bmin_1.14_bmax_1.16	MFD_double_GR	Set_1	TMG2017_L_mH3bg_BG_1bmin_1.14_bmax_1.16MFD_double_GRSet_1	sample_2	12.482	0.235	1	0.883	0.56	0.116203		0.8	0.7	0.6
TMG2017_L_m	H3	bg_BG_1	bmin_1.14_bmax_1.16	MFD_double_GR	Set_1	TMG2017_L_mH3bg_BG_1bmin_1.14_bmax_1.16MFD_double_GRSet_1	sample_3	13.752	0.217	0	0.729	0.56	0		0.8	0.7	0.32
TMG2017_L_m	H3	bg_BG_1	bmin_1.14_bmax_1.16	MFD_double_GR	Set_1	TMG2017_L_mH3bg_BG_1bmin_1.14_bmax_1.16MFD_double_GRSet_1	sample_4	12.438	0.254	0	0.703	0.56	0		0.8	0.7	0.6
TMG2017_L_m	H3	bg_BG_1	bmin_1.14_bmax_1.16	MFD_double_GR	Set_1	TMG2017_L_mH3bg_BG_1bmin_1.14_bmax_1.16MFD_double_GRSet_1	sample_5	12.437	0.704	0	0.755	0.56	0		0.8	0.7	0.94
TMG2017_L_m	H3	bg_BG_1	bmin_1.14_bmax_1.16	MFD_double_GR	Set_1	TMG2017_L_mH3bg_BG_1bmin_1.14_bmax_1.16MFD_double_GRSet_1	sample_6	11.994	0.275	0	0.731	0.56	0		0.8	0.7	0.6
TMG2017_L_m	H3	bg_BG_1	bmin_1.14_bmax_1.16	MFD_double_GR	Set_1	TMG2017_L_mH3bg_BG_1bmin_1.14_bmax_1.16MFD_double_GRSet_1	sample_7	13.167	0.28	1	0.89	0.56	0.139552		0.8	0.7	0.6
TMG2017_L_m	H3	bg_BG_1	bmin_1.14_bmax_1.16	MFD_double_GR	Set_1	TMG2017_L_mH3bg_BG_1bmin_1.14_bmax_1.16MFD_double_GRSet_1	sample_8	12.464	0.209	1	0.896	0.56	0.104868		0.8	0.7	0.32
TMG2017_L_m	H3	bg_BG_1	bmin_1.14_bmax_1.16	MFD_double_GR	Set_1	TMG2017_L_mH3bg_BG_1bmin_1.14_bmax_1.16MFD_double_GRSet_1	sample_9	13.759	0.406	0	0.125	0.56	0		0.8	0.7	0.88
TMG2017_L_m	H3	bg_BG_1	bmin_1.14_bmax_1.16	MFD_double_GR	Set_1	TMG2017_L_mH3bg_BG_1bmin_1.14_bmax_1.16MFD_double_GRSet_1	sample_10	12.544	0.693	1	0.891	0.56	0.345779		0.8	0.7	0.94
TMG2017_L_m	H3	bg_BG_2	bmin_1.14_bmax_1.16	MFD_double_GR	Set_1	TMG2017_L_mH3bg_BG_2bmin_1.14_bmax_1.16MFD_double_GRSet_1	sample_1	12.812	0.18	0	0.81	0.56	0		0.8	0.7	0.6
TMG2017_L_m	H3	bg_BG_2	bmin_1.14_bmax_1.16	MFD_double_GR	Set_1	TMG2017_L_mH3bg_BG_2bmin_1.14_bmax_1.16MFD_double_GRSet_1	sample_2	13.062	0.122	1	0.87	0.56	0.0594384		0.8	0.7	0.88
TMG2017_L_m	H3	bg_BG_2	bmin_1.14_bmax_1.16	MFD_double_GR	Set_1	TMG2017_L_mH3bg_BG_2bmin_1.14_bmax_1.16MFD_double_GRSet_1	sample_3	12.542	0.358	0	0.246	0.56	0		0.8	0.7	0.88
TMG2017_L_m	H3	bg_BG_2	bmin_1.14_bmax_1.16	MFD_double_GR	Set_1	TMG2017_L_mH3bg_BG_2bmin_1.14_bmax_1.16MFD_double_GRSet_1	sample_4	12.487	0.062	0	0.771	0.56	0		0.8	0.7	0.6
TMG2017_L_m	H3	bg_BG_2	bmin_1.14_bmax_1.16	MFD_double_GR	Set_1	TMG2017_L_mH3bg_BG_2bmin_1.14_bmax_1.16MFD_double_GRSet_1	sample_5	11.82	0.064	0	0.655	0.56	0		0.8	0.7	0.6
TMG2017_L_m	H3	bg_BG_2	bmin_1.14_bmax_1.16	MFD_double_GR	Set_1	TMG2017_L_mH3bg_BG_2bmin_1.14_bmax_1.16MFD_double_GRSet_1	sample_6	11.861	0.178	1	0.872	0.56	0.086921		0.8	0.7	0.88
TMG2017_L_m	H3	bg_BG_2	bmin_1.14_bmax_1.16	MFD_double_GR	Set_1	TMG2017_L_mH3bg_BG_2bmin_1.14_bmax_1.16MFD_double_GRSet_1	sample_7	11.883	0.203	0	0.628	0.56	0		0.8	0.7	0.32
TMG2017_L_m	H3	bg_BG_2	bmin_1.14_bmax_1.16	MFD_double_GR	Set_1	TMG2017_L_mH3bg_BG_2bmin_1.14_bmax_1.16MFD_double_GRSet_1	sample_8	13.677	0.013	1	0.897	0.56	0.00653016		0.8	0.7	0.32
TMG2017_L_m	H3	bg_BG_2	bmin_1.14_bmax_1.16	MFD_double_GR	Set_1	TMG2017_L_mH3bg_BG_2bmin_1.14_bmax_1.16MFD_double_GRSet_1	sample_9	13.723	0.046	0	0.146	0.56	0		0.8	0.7	0.6
TMG2017_L_m	H3	bg_BG_2	bmin_1.14_bmax_1.16	MFD_double_GR	Set_1	TMG2017_L_mH3bg_BG_2bmin_1.14_bmax_1.16MFD_double_GRSet_1	sample_10	13.689	0.465	1	0.851	0.56	0.2216		0.8	0.7	0.94
TMG2017_L_m	H3	bg_BG_3	bmin_1.14_bmax_1.16	MFD_double_GR	Set_1	TMG2017_L_mH3bg_BG_3bmin_1.14_bmax_1.16MFD_double_GRSet_1	sample_1	12.812	0.23	0	0.813	0.56	0		0.8	0.7	0.6
TMG2017_L_m	H3	bg_BG_3	bmin_1.14_bmax_1.16	MFD_double_GR	Set_1	TMG2017_L_mH3bg_BG_3bmin_1.14_bmax_1.16MFD_double_GRSet_1	sample_2	12.537	0.639	0	0.751	0.56	0		0.8	0.7	0.88
TMG2017_L_m	H3	bg_BG_3	bmin_1.14_bmax_1.16	MFD_double_GR	Set_1	TMG2017_L_mH3bg_BG_3bmin_1.14_bmax_1.16MFD_double_GRSet_1	sample_3	11.982	0.752	1	0.899	0.56	0.378587		0.8	0.7	0.94
TMG2017_L_m	H3	bg_BG_3	bmin_1.14_bmax_1.16	MFD_double_GR	Set_1	TMG2017_L_mH3bg_BG_3bmin_1.14_bmax_1.16MFD_double_GRSet_1	sample_4	12.593	0.318	1	0.866	0.56	0.154217		0.8	0.7	0.6
TMG2017_L_m	H3	bg_BG_3	bmin_1.14_bmax_1.16	MFD_double_GR	Set_1	TMG2017_L_mH3bg_BG_3bmin_1.14_bmax_1.16MFD_double_GRSet_1	sample_5	13.096	0.528	1	0.853	0.56	0.252215		0.8	0.7	0.94
TMG2017_L_m	H3	bg_BG_3	bmin_1.14_bmax_1.16	MFD_double_GR	Set_1	TMG2017_L_mH3bg_BG_3bmin_1.14_bmax_1.16MFD_double_GRSet_1	sample_6	11.965	0.28	1	0.859	0.56	0.134691		0.8	0.7	0.88
TMG2017_L_m	H3	bg_BG_3	bmin_1.14_bmax_1.16	MFD_double_GR	Set_1	TMG2017_L_mH3bg_BG_3bmin_1.14_bmax_1.16MFD_double_GRSet_1	sample_7	12.49	0.293	1	0.872	0.56	0.143078		0.8	0.7	0.6
TMG2017_L_m	H3	bg_BG_3	bmin_1.14_bmax_1.16	MFD_double_GR	Set_1	TMG2017_L_mH3bg_BG_3bmin_1.14_bmax_1.16MFD_double_GRSet_1	sample_8	12.379	0.109	0	0.744	0.56	0		0.8	0.7	0.32
TMG2017_L_m	H3	bg_BG_3	bmin_1.14_bmax_1.16	MFD_double_GR	Set_1	TMG2017_L_mH3bg_BG_3bmin_1.14_bmax_1.16MFD_double_GRSet_1	sample_9	11.923	0.753	0	0.779	0.56	0		0.8	0.7	0.94
TMG2017_L_m	H3	bg_BG_3	bmin_1.14_bmax_1.16	MFD_double_GR	Set_1	TMG2017_L_mH3bg_BG_3bmin_1.14_bmax_1.16MFD_double_GRSet_1	sample_10	12.53	0.173	0	0.71	0.56	0		0.8	0.7	0.6
TMG2017_L_m	H3	bg_BG_1	bmin_1.14_bmax_1.16	MFD_GR	Set_2	TMG2017_L_mH3bg_BG_1bmin_1.14_bmax_1.16MFD_GRSet_2	sample_1	12.812	0.823	0	0.775	0.06	0		0.2	0.3	0.6
TMG2017_L_m	H3	bg_BG_1	bmin_1.14_bmax_1.16	MFD_GR	Set_2	TMG2017_L_mH3bg_BG_1bmin_1.14_bmax_1.16MFD_GRSet_2	sample_2	11.979	0.787	0	0.673	0.06	0		0.2	0.3	0.6
TMG2017_L_m	H3	bg_BG_1	bmin_1.14_bmax_1.16	MFD_GR	Set_2	TMG2017_L_mH3bg_BG_1bmin_1.14_bmax_1.16MFD_GRSet_2	sample_3	12.488	0.84	0	0.429	0.06	0		0.2	0.3	0.88
TMG2017_L_m	H3	bg_BG_1	bmin_1.14_bmax_1.16	MFD_GR	Set_2	TMG2017_L_mH3bg_BG_1bmin_1.14_bmax_1.16MFD_GRSet_2	sample_4	13.124	0.838	0	0.738	0.06	0		0.2	0.3	0.32
TMG2017_L_m	H3	bg_BG_1	bmin_1.14_bmax_1.16	MFD_GR	Set_2	TMG2017_L_mH3bg_BG_1bmin_1.14_bmax_1.16MFD_GRSet_2	sample_5	12.494	0.843	0	0.456	0.06	0		0.2	0.3	0.88
TMG2017_L_m	H3	bg_BG_1	bmin_1.14_bmax_1.16	MFD_GR	Set_2	TMG2017_L_mH3bg_BG_1bmin_1.14_bmax_1.16MFD_GRSet_2	sample_6	12.99	0.851	0	0.647	0.06	0		0.2	0.3	0.6
TMG2017_L_m	H3	bg_BG_1	bmin_1.14_bmax_1.16	MFD_GR	Set_2	TMG2017_L_mH3bg_BG_1bmin_1.14_bmax_1.16MFD_GRSet_2	sample_7	13.119	0.751	0	0.652	0.06	0		0.2	0.3	0.6
TMG2017_L_m	H3	bg_BG_1	bmin_1.14_bmax_1.16	MFD_GR	Set_2	TMG2017_L_mH3bg_BG_1bmin_1.14_bmax_1.16MFD_GRSet_2	sample_8	11.815	0.839	0	0.667	0.06	0		0.2	0.3	0.88
TMG2017_L_m	H3	bg_BG_1	bmin_1.14_bmax_1.16	MFD_GR	Set_2	TMG2017_L_mH3bg_BG_1bmin_1.14_bmax_1.16MFD_GRSet_2	sample_9	11.908	0	0	0.618	0.06	0		0.2	0.3	0.94
TMG2017_L_m	H3	bg_BG_1	bmin_1.14_bmax_1.16	MFD_GR	Set_2	TMG2017_L_mH3bg_BG_1bmin_1.14_bmax_1.16MFD_GRSet_2	sample_10	12.52	0.83	0	0.659	0.06	0		0.2	0.3	0.88
TMG2017_L_m	H3	bg_BG_2	bmin_1.14_bmax_1.16	MFD_GR	Set_2	TMG2017_L_mH3bg_BG_2bmin_1.14_bmax_1.16MFD_GRSet_2	sample_1	12.812	0.868	0	0.754	0.06	0		0.2	0.3	0.6
TMG2017_L_m	H3	bg_BG_2	bmin_1.14_bmax_1.16	MFD_GR	Set_2	TMG2017_L_mH3bg_BG_2bmin_1.14_bmax_1.16MFD_GRSet_2	sample_2	13.058	0.892	0	0.674	0.06	0		0.2	0.3	0.6
TMG2017_L_m	H3	bg_BG_2	bmin_1.14_bmax_1.16	MFD_GR	Set_2	TMG2017_L_mH3bg_BG_2bmin_1.14_bmax_1.16MFD_GRSet_2	sample_3	13.645	0.916	0	0.614	0.06	0		0.2	0.3	0.6
TMG2017_L_m	H3	bg_BG_2	bmin_1.14_bmax_1.16	MFD_GR	Set_2	TMG2017_L_mH3bg_BG_2bmin_1.14_bmax_1.16MFD_GRSet_2	sample_4	12.47	0.889	0	0.454	0.06	0		0.2	0.3	0.6
TMG2017_L_m	H3	bg_BG_2	bmin_1.14_bmax_1.16	MFD_GR	Set_2	TMG2017_L_mH3bg_BG_2bmin_1.14_bmax_1.16MFD_GRSet_2	sample_5	13.685	0.668	0	0.36	0.06	0		0.2	0.3	0.94
TMG2017_L_m	H3	bg_BG_2	bmin_1.14_bmax_1.16	MFD_GR	Set_2	TMG2017_L_mH3bg_BG_2bmin_1.14_bmax_1.16MFD_GRSet_2	sample_6	13.104	0.89	0	0.632	0.06	0		0.2	0.3	0.6
TMG2017_L_m	H3	bg_BG_2	bmin_1.14_bmax_1.16	MFD_GR	Set_2	TMG2017_L_mH3bg_BG_2bmin_1.14_bmax_1.16MFD_GRSet_2	sample_7	13.701	0.903	0	0.635	0.06	0		0.2	0.3	0.6
TMG2017_L_m	H3	bg_BG_2	bmin_1.14_bmax_1.16	MFD_GR	Set_2	TMG2017_L_mH3bg_BG_2bmin_1.14_bmax_1.16MFD_GRSet_2	sample_8	13.706	0.887	0	0.625	0.06	0		0.2	0.3	0.6
TMG2017_L_m	H3	bg_BG_2	bmin_1.14_bmax_1.16	MFD_GR	Set_2	TMG2017_L_mH3bg_BG_2bmin_1.14_bmax_1.16MFD_GRSet_2	sample_9	11.995	0.745	0	0.442	0.06	0		0.2	0.3	0.6
TMG2017_L_m	H3	bg_BG_2	bmin_1.14_bmax_1.16	MFD_GR	Set_2	TMG2017_L_mH3bg_BG_2bmin_1.14_bmax_1.16MFD_GRSet_2	sample_10	13.063	0.9	0	0.43	0.06	0		0.2	0.3	0.32
TMG2017_L_m	H3	bg_BG_3	bmin_1.14_bmax_1.16	MFD_GR	Set_2	TMG2017_L_mH3bg_BG_3bmin_1.14_bmax_1.16MFD_GRSet_2	sample_1	12.812	0.856	0	0.736	0.06	0		0.2	0.3	0.6
TMG2017_L_m	H3	bg_BG_3	bmin_1.14_bmax_1.16	MFD_GR	Set_2	TMG2017_L_mH3bg_BG_3bmin_1.14_bmax_1.16MFD_GRSet_2	sample_2	13.682	0.764	0	0.431	0.06	0		0.2	0.3	0.88
TMG2017_L_m	H3	bg_BG_3	bmin_1.14_bmax_1.16	MFD_GR	Set_2	TMG2017_L_mH3bg_BG_3bmin_1.14_bmax_1.16MFD_GRSet_2	sample_3	13.735	0.783	0	0.375	0.06	0		0.2	0.3	0.94
TMG2017_L_m	H3	bg_BG_3	bmin_1.14_bmax_1.16	MFD_GR	Set_2	TMG2017_L_mH3bg_BG_3bmin_1.14_bmax_1.16MFD_GRSet_2	sample_4	11.915	0.792	0	0.452	0.06	0		0.2	0.3	0.6
TMG2017_L_m	H3	bg_BG_3	bmin_1.14_bmax_1.16	MFD_GR	Set_2	TMG2017_L_mH3bg_BG_3bmin_1.14_bmax_1.16MFD_GRSet_2	sample_5	13.095	0.822	0	0.261	0.06	0		0.2	0.3	0.88
TMG2017_L_m	H3	bg_BG_3	bmin_1.14_bmax_1.16	MFD_GR	Set_2	TMG2017_L_mH3bg_BG_3bmin_1.14_bmax_1.16MFD_GRSet_2	sample_6	13.072	0.448	1	0.536	0.06	0.0144077		0.2	0.3	0.6
TMG2017_L_m	H3	bg_BG_3	bmin_1.14_bmax_1.16	MFD_GR	Set_2	TMG2017_L_mH3bg_BG_3bmin_1.14_bmax_1.16MFD_GRSet_2	sample_7	12.546	0.846	0	0.459	0.06	0		0.2	0.3	0.88
TMG2017_L_m	H3	bg_BG_3	bmin_1.14_bmax_1.16	MFD_GR	Set_2	TMG2017_L_mH3bg_BG_3bmin_1.14_bmax_1.16MFD_GRSet_2	sample_8	13.601	0.725	0	0.496	0.06	0		0.2	0.3	0.88
TMG2017_L_m	H3	bg_BG_3	bmin_1.14_bmax_1.16	MFD_GR	Set_2	TMG2017_L_mH3bg_BG_3bmin_1.14_bmax_1.16MFD_GRSet_2	sample_9	12.415	0	0	0.403	0.06	0		0.2	0.3	0.94
TMG2017_L_m	H3	bg_BG_3	bmin_1.14_bmax_1.16	MFD_GR	Set_2	TMG2017_L_mH3bg_BG_3bmin_1.14_bmax_1.16MFD_GRSet_2	sample_10	13.071	0.685	1	0.719	0.06	0.0295509		0.2	0.3	0.6
TMG2017_L_m	H3	bg_BG_1	bmin_1.14_bmax_1.16	MFD_double_GR	Set_2	TMG2017_L_mH3bg_BG_1bmin_1.14_bmax_1.16MFD_double_GRSet_2	sample_1	12.812	0.877	0	0.778	0.24	0		0.8	0.3	0.6
TMG2017_L_m	H3	bg_BG_1	bmin_1.14_bmax_1.16	MFD_double_GR	Set_2	TMG2017_L_mH3bg_BG_1bmin_1.14_bmax_1.16MFD_double_GRSet_2	sample_2	13.085	0.901	0	0.668	0.24	0		0.8	0.3	0.6
TMG2017_L_m	H3	bg_BG_1	bmin_1.14_bmax_1.16	MFD_double_GR	Set_2	TMG2017_L_mH3bg_BG_1bmin_1.14_bmax_1.16MFD_double_GRSet_2	sample_3	13.702	0.875	0	0.561	0.24	0		0.8	0.3	0.6
TMG2017_L_m	H3	bg_BG_1	bmin_1.14_bmax_1.16	MFD_double_GR	Set_2	TMG2017_L_mH3bg_BG_1bmin_1.14_bmax_1.16MFD_double_GRSet_2	sample_4	11.958	0.326	0	0.781	0.24	0		0.8	0.3	0.94
TMG2017_L_m	H3	bg_BG_1	bmin_1.14_bmax_1.16	MFD_double_GR	Set_2	TMG2017_L_mH3bg_BG_1bmin_1.14_bmax_1.16MFD_double_GRSet_2	sample_5	11.916	0.821	0	0.24	0.24	0		0.8	0.3	0.96
TMG2017_L_m	H3	bg_BG_1	bmin_1.14_bmax_1.16	MFD_double_GR	Set_2	TMG2017_L_mH3bg_BG_1bmin_1.14_bmax_1.16MFD_double_GRSet_2	sample_6	13.081	0.886	0	0.66	0.24	0		0.8	0.3	0.6
TMG2017_L_m	H3	bg_BG_1	bmin_1.14_bmax_1.16	MFD_double_GR	Set_2	TMG2017_L_mH3bg_BG_1bmin_1.14_bmax_1.16MFD_double_GRSet_2	sample_7	13.052	0.884	0	0.611	0.24	0		0.8	0.3	0.88
TMG2017_L_m	H3	bg_BG_1	bmin_1.14_bmax_1.16	MFD_double_GR	Set_2	TMG2017_L_mH3bg_BG_1bmin_1.14_bmax_1.16MFD_double_GRSet_2	sample_8	12.474	0.8	0	0.595	0.24	0		0.8	0.3	0.88
TMG2017_L_m	H3	bg_BG_1	bmin_1.14_bmax_1.16	MFD_double_GR	Set_2	TMG2017_L_mH3bg_BG_1bmin_1.14_bmax_1.16MFD_double_GRSet_2	sample_9	13.668	0.479	0	0.552	0.24	0		0.8	0.3	0.96
TMG2017_L_m	H3	bg_BG_1	bmin_1.14_bmax_1.16	MFD_double_GR	Set_2	TMG2017_L_mH3bg_BG_1bmin_1.14_bmax_1.16MFD_double_GRSet_2	sample_10	12.562	0.872	0	0.583	0.24	0		0.8	0.3	0.6
TMG2017_L_m	H3	bg_BG_2	bmin_1.14_bmax_1.16	MFD_double_GR	Set_2	TMG2017_L_mH3bg_BG_2bmin_1.14_bmax_1.16MFD_double_GRSet_2	sample_1	12.812	0.867	0	0.746	0.24	0		0.8	0.3	0.6
TMG2017_L_m	H3	bg_BG_2	bmin_1.14_bmax_1.16	MFD_double_GR	Set_2	TMG2017_L_mH3bg_BG_2bmin_1.14_bmax_1.16MFD_double_GRSet_2	sample_2	11.914	0.773	0	0.649	0.24	0		0.8	0.3	0.32
TMG2017_L_m	H3	bg_BG_2	bmin_1.14_bmax_1.16	MFD_double_GR	Set_2	TMG2017_L_mH3bg_BG_2bmin_1.14_bmax_1.16MFD_double_GRSet_2	sample_3	11.93	0.83	0	0.573	0.24	0		0.8	0.3	0.88
TMG2017_L_m	H3	bg_BG_2	bmin_1.14_bmax_1.16	MFD_double_GR	Set_2	TMG2017_L_mH3bg_BG_2bmin_1.14_bmax_1.16MFD_double_GRSet_2	sample_4	13.156	0.605	0	0.242	0.24	0		0.8	0.3	0.6
TMG2017_L_m	H3	bg_BG_2	bmin_1.14_bmax_1.16	MFD_double_GR	Set_2	TMG2017_L_mH3bg_BG_2bmin_1.14_bmax_1.16MFD_double_GRSet_2	sample_5	11.978	0.773	0	0.357	0.24	0		0.8	0.3	0.6
TMG2017_L_m	H3	bg_BG_2	bmin_1.14_bmax_1.16	MFD_double_GR	Set_2	TMG2017_L_mH3bg_BG_2bmin_1.14_bmax_1.16MFD_double_GRSet_2	sample_6	11.962	0.79	0	0.559	0.24	0		0.8	0.3	0.6
TMG2017_L_m	H3	bg_BG_2	bmin_1.14_bmax_1.16	MFD_double_GR	Set_2	TMG2017_L_mH3bg_BG_2bmin_1.14_bmax_1.16MFD_double_GRSet_2	sample_7	12.512	0.783	0	0.621	0.24	0		0.8	0.3	0.88
TMG2017_L_m	H3	bg_BG_2	bmin_1.14_bmax_1.16	MFD_double_GR	Set_2	TMG2017_L_mH3bg_BG_2bmin_1.14_bmax_1.16MFD_double_GRSet_2	sample_8	13.692	0.85	0	0.585	0.24	0		0.8	0.3	0.6
TMG2017_L_m	H3	bg_BG_2	bmin_1.14_bmax_1.16	MFD_double_GR	Set_2	TMG2017_L_mH3bg_BG_2bmin_1.14_bmax_1.16MFD_double_GRSet_2	sample_9	11.964	0.841	0	0.248	0.24	0		0.8	0.3	0.6
TMG2017_L_m	H3	bg_BG_2	bmin_1.14_bmax_1.16	MFD_double_GR	Set_2	TMG2017_L_mH3bg_BG_2bmin_1.14_bmax_1.16MFD_double_GRSet_2	sample_10	11.934	0.813	0	0.594	0.24	0		0.8	0.3	0.6
TMG2017_L_m	H3	bg_BG_3	bmin_1.14_bmax_1.16	MFD_double_GR	Set_2	TMG2017_L_mH3bg_BG_3bmin_1.14_bmax_1.16MFD_double_GRSet_2	sample_1	12.812	0.893	0	0.758	0.24	0		0.8	0.3	0.6
TMG2017_L_m	H3	bg_BG_3	bmin_1.14_bmax_1.16	MFD_double_GR	Set_2	TMG2017_L_mH3bg_BG_3bmin_1.14_bmax_1.16MFD_double_GRSet_2	sample_2	12.562	0.89	0	0.565	0.24	0		0.8	0.3	0.32
TMG2017_L_m	H3	bg_BG_3	bmin_1.14_bmax_1.16	MFD_double_GR	Set_2	TMG2017_L_mH3bg_BG_3bmin_1.14_bmax_1.16MFD_double_GRSet_2	sample_3	13.124	0.89	0	0.513	0.24	0		0.8	0.3	0.6
TMG2017_L_m	H3	bg_BG_3	bmin_1.14_bmax_1.16	MFD_double_GR	Set_2	TMG2017_L_mH3bg_BG_3bmin_1.14_bmax_1.16MFD_double_GRSet_2	sample_4	13.672	0.775	0	0.258	0.24	0		0.8	0.3	0.94
TMG2017_L_m	H3	bg_BG_3	bmin_1.14_bmax_1.16	MFD_double_GR	Set_2	TMG2017_L_mH3bg_BG_3bmin_1.14_bmax_1.16MFD_double_GRSet_2	sample_5	13.122	0.853	0	0.25	0.24	0		0.8	0.3	0.96
TMG2017_L_m	H3	bg_BG_3	bmin_1.14_bmax_1.16	MFD_double_GR	Set_2	TMG2017_L_mH3bg_BG_3bmin_1.14_bmax_1.16MFD_double_GRSet_2	sample_6	11.878	0.304	0	0.241	0.24	0		0.8	0.3	0.94
TMG2017_L_m	H3	bg_BG_3	bmin_1.14_bmax_1.16	MFD_double_GR	Set_2	TMG2017_L_mH3bg_BG_3bmin_1.14_bmax_1.16MFD_double_GRSet_2	sample_7	11.928	0.306	0	0.239	0.24	0		0.8	0.3	0.94
TMG2017_L_m	H3	bg_BG_3	bmin_1.14_bmax_1.16	MFD_double_GR	Set_2	TMG2017_L_mH3bg_BG_3bmin_1.14_bmax_1.16MFD_double_GRSet_2	sample_8	11.956	0.811	0	0.25	0.24	0		0.8	0.3	0.96
TMG2017_L_m	H3	bg_BG_3	bmin_1.14_bmax_1.16	MFD_double_GR	Set_2	TMG2017_L_mH3bg_BG_3bmin_1.14_bmax_1.16MFD_double_GRSet_2	sample_9	13.102	0.82	0	0.587	0.24	0		0.8	0.3	0.6
TMG2017_L_m	H3	bg_BG_3	bmin_1.14_bmax_1.16	MFD_double_GR	Set_2	TMG2017_L_mH3bg_BG_3bmin_1.14_bmax_1.16MFD_double_GRSet_2	sample_10	11.822	0.898	0	0.639	0.24	0		0.8	0.3	0.88
TMG2017_L_m	H4	bg_BG_1	bmin_1.14_bmax_1.16	MFD_GR	Set_1	TMG2017_L_mH4bg_BG_1bmin_1.14_bmax_1.16MFD_GRSet_1	sample_1	14.4	0.199	1	0.918	0.14	0.0255755		0.2	0.7	0.66
TMG2017_L_m	H4	bg_BG_1	bmin_1.14_bmax_1.16	MFD_GR	Set_1	TMG2017_L_mH4bg_BG_1bmin_1.14_bmax_1.16MFD_GRSet_1	sample_2	14.036	0.222	1	0.892	0.14	0.0277234		0.2	0.7	0.88
TMG2017_L_m	H4	bg_BG_1	bmin_1.14_bmax_1.16	MFD_GR	Set_1	TMG2017_L_mH4bg_BG_1bmin_1.14_bmax_1.16MFD_GRSet_1	sample_3	14.71	0.119	1	0.893	0.14	0.0148774		0.2	0.7	0.28
TMG2017_L_m	H4	bg_BG_1	bmin_1.14_bmax_1.16	MFD_GR	Set_1	TMG2017_L_mH4bg_BG_1bmin_1.14_bmax_1.16MFD_GRSet_1	sample_4	13.438	0.112	1	0.892	0.14	0.0139866		0.2	0.7	0.28
TMG2017_L_m	H4	bg_BG_1	bmin_1.14_bmax_1.16	MFD_GR	Set_1	TMG2017_L_mH4bg_BG_1bmin_1.14_bmax_1.16MFD_GRSet_1	sample_5	13.49	0.223	1	0.934	0.14	0.0291595		0.2	0.7	0.66
TMG2017_L_m	H4	bg_BG_1	bmin_1.14_bmax_1.16	MFD_GR	Set_1	TMG2017_L_mH4bg_BG_1bmin_1.14_bmax_1.16MFD_GRSet_1	sample_6	14.724	0.116	1	0.911	0.14	0.0147946		0.2	0.7	0.66
TMG2017_L_m	H4	bg_BG_1	bmin_1.14_bmax_1.16	MFD_GR	Set_1	TMG2017_L_mH4bg_BG_1bmin_1.14_bmax_1.16MFD_GRSet_1	sample_7	13.403	0.216	0	0.867	0.14	0		0.2	0.7	0.28
TMG2017_L_m	H4	bg_BG_1	bmin_1.14_bmax_1.16	MFD_GR	Set_1	TMG2017_L_mH4bg_BG_1bmin_1.14_bmax_1.16MFD_GRSet_1	sample_8	13.521	0.298	1	0.853	0.14	0.0355872		0.2	0.7	0.88
TMG2017_L_m	H4	bg_BG_1	bmin_1.14_bmax_1.16	MFD_GR	Set_1	TMG2017_L_mH4bg_BG_1bmin_1.14_bmax_1.16MFD_GRSet_1	sample_9	14.08	0.194	1	0.923	0.14	0.0250687		0.2	0.7	0.66
TMG2017_L_m	H4	bg_BG_1	bmin_1.14_bmax_1.16	MFD_GR	Set_1	TMG2017_L_mH4bg_BG_1bmin_1.14_bmax_1.16MFD_GRSet_1	sample_10	13.443	0.163	1	0.894	0.14	0.0204011		0.2	0.7	0.66
TMG2017_L_m	H4	bg_BG_2	bmin_1.14_bmax_1.16	MFD_GR	Set_1	TMG2017_L_mH4bg_BG_2bmin_1.14_bmax_1.16MFD_GRSet_1	sample_1	14.4	0.46	1	0.917	0.14	0.0590548		0.2	0.7	0.92
TMG2017_L_m	H4	bg_BG_2	bmin_1.14_bmax_1.16	MFD_GR	Set_1	TMG2017_L_mH4bg_BG_2bmin_1.14_bmax_1.16MFD_GRSet_1	sample_2	13.421	0.558	1	0.89	0.14	0.0695268		0.2	0.7	0.92
TMG2017_L_m	H4	bg_BG_2	bmin_1.14_bmax_1.16	MFD_GR	Set_1	TMG2017_L_mH4bg_BG_2bmin_1.14_bmax_1.16MFD_GRSet_1	sample_3	15.415	0.511	1	0.888	0.14	0.0635275		0.2	0.7	0.9
TMG2017_L_m	H4	bg_BG_2	bmin_1.14_bmax_1.16	MFD_GR	Set_1	TMG2017_L_mH4bg_BG_2bmin_1.14_bmax_1.16MFD_GRSet_1	sample_4	14.041	0.742	1	0.693	0.14	0.0719888		0.2	0.7	0.96
TMG2017_L_m	H4	bg_BG_2	bmin_1.14_bmax_1.16	MFD_GR	Set_1	TMG2017_L_mH4bg_BG_2bmin_1.14_bmax_1.16MFD_GRSet_1	sample_5	14.722	0.42	1	0.898	0.14	0.0528024		0.2	0.7	0.92
TMG2017_L_m	H4	bg_BG_2	bmin_1.14_bmax_1.16	MFD_GR	Set_1	TMG2017_L_mH4bg_BG_2bmin_1.14_bmax_1.16MFD_GRSet_1	sample_6	13.376	0.593	1	0.925	0.14	0.0767935		0.2	0.7	0.92
TMG2017_L_m	H4	bg_BG_2	bmin_1.14_bmax_1.16	MFD_GR	Set_1	TMG2017_L_mH4bg_BG_2bmin_1.14_bmax_1.16MFD_GRSet_1	sample_7	13.335	0.717	1	0.902	0.14	0.0905428		0.2	0.7	0.96
TMG2017_L_m	H4	bg_BG_2	bmin_1.14_bmax_1.16	MFD_GR	Set_1	TMG2017_L_mH4bg_BG_2bmin_1.14_bmax_1.16MFD_GRSet_1	sample_8	13.981	0.461	1	0.86	0.14	0.0555044		0.2	0.7	0.92
TMG2017_L_m	H4	bg_BG_2	bmin_1.14_bmax_1.16	MFD_GR	Set_1	TMG2017_L_mH4bg_BG_2bmin_1.14_bmax_1.16MFD_GRSet_1	sample_9	14.677	0.716	1	0.704	0.14	0.070569		0.2	0.7	0.96
TMG2017_L_m	H4	bg_BG_2	bmin_1.14_bmax_1.16	MFD_GR	Set_1	TMG2017_L_mH4bg_BG_2bmin_1.14_bmax_1.16MFD_GRSet_1	sample_10	14.705	0.438	1	0.61	0.14	0.0374052		0.2	0.7	0.92
TMG2017_L_m	H4	bg_BG_3	bmin_1.14_bmax_1.16	MFD_GR	Set_1	TMG2017_L_mH4bg_BG_3bmin_1.14_bmax_1.16MFD_GRSet_1	sample_1	14.4	0.124	1	0.912	0.14	0.0158323		0.2	0.7	0.66
TMG2017_L_m	H4	bg_BG_3	bmin_1.14_bmax_1.16	MFD_GR	Set_1	TMG2017_L_mH4bg_BG_3bmin_1.14_bmax_1.16MFD_GRSet_1	sample_2	14.638	0.097	1	0.862	0.14	0.011706		0.2	0.7	0.66
TMG2017_L_m	H4	bg_BG_3	bmin_1.14_bmax_1.16	MFD_GR	Set_1	TMG2017_L_mH4bg_BG_3bmin_1.14_bmax_1.16MFD_GRSet_1	sample_3	14.072	0.046	1	0.852	0.14	0.00548688		0.2	0.7	0.28
TMG2017_L_m	H4	bg_BG_3	bmin_1.14_bmax_1.16	MFD_GR	Set_1	TMG2017_L_mH4bg_BG_3bmin_1.14_bmax_1.16MFD_GRSet_1	sample_4	14.72	0.119	1	0.864	0.14	0.0143942		0.2	0.7	0.66
TMG2017_L_m	H4	bg_BG_3	bmin_1.14_bmax_1.16	MFD_GR	Set_1	TMG2017_L_mH4bg_BG_3bmin_1.14_bmax_1.16MFD_GRSet_1	sample_5	15.352	0.125	1	0.896	0.14	0.01568		0.2	0.7	0.66
TMG2017_L_m	H4	bg_BG_3	bmin_1.14_bmax_1.16	MFD_GR	Set_1	TMG2017_L_mH4bg_BG_3bmin_1.14_bmax_1.16MFD_GRSet_1	sample_6	13.488	0.062	1	0.861	0.14	0.00747348		0.2	0.7	0.28
TMG2017_L_m	H4	bg_BG_3	bmin_1.14_bmax_1.16	MFD_GR	Set_1	TMG2017_L_mH4bg_BG_3bmin_1.14_bmax_1.16MFD_GRSet_1	sample_7	15.321	0.095	1	0.878	0.14	0.0116774		0.2	0.7	0.66
TMG2017_L_m	H4	bg_BG_3	bmin_1.14_bmax_1.16	MFD_GR	Set_1	TMG2017_L_mH4bg_BG_3bmin_1.14_bmax_1.16MFD_GRSet_1	sample_8	15.404	0.123	1	0.886	0.14	0.0152569		0.2	0.7	0.66
TMG2017_L_m	H4	bg_BG_3	bmin_1.14_bmax_1.16	MFD_GR	Set_1	TMG2017_L_mH4bg_BG_3bmin_1.14_bmax_1.16MFD_GRSet_1	sample_9	15.38	0.374	1	0.828	0.14	0.0433541		0.2	0.7	0.92
TMG2017_L_m	H4	bg_BG_3	bmin_1.14_bmax_1.16	MFD_GR	Set_1	TMG2017_L_mH4bg_BG_3bmin_1.14_bmax_1.16MFD_GRSet_1	sample_10	15.358	0.13	1	0.854	0.14	0.0155428		0.2	0.7	0.88
TMG2017_L_m	H4	bg_BG_1	bmin_1.14_bmax_1.16	MFD_double_GR	Set_1	TMG2017_L_mH4bg_BG_1bmin_1.14_bmax_1.16MFD_double_GRSet_1	sample_1	14.4	0.436	1	0.904	0.56	0.220721		0.8	0.7	0.92
TMG2017_L_m	H4	bg_BG_1	bmin_1.14_bmax_1.16	MFD_double_GR	Set_1	TMG2017_L_mH4bg_BG_1bmin_1.14_bmax_1.16MFD_double_GRSet_1	sample_2	13.443	0.538	1	0.872	0.56	0.262716		0.8	0.7	0.92
TMG2017_L_m	H4	bg_BG_1	bmin_1.14_bmax_1.16	MFD_double_GR	Set_1	TMG2017_L_mH4bg_BG_1bmin_1.14_bmax_1.16MFD_double_GRSet_1	sample_3	14.733	0.447	1	0.901	0.56	0.225538		0.8	0.7	0.92
TMG2017_L_m	H4	bg_BG_1	bmin_1.14_bmax_1.16	MFD_double_GR	Set_1	TMG2017_L_mH4bg_BG_1bmin_1.14_bmax_1.16MFD_double_GRSet_1	sample_4	14.09	0.29	1	0.89	0.56	0.144536		0.8	0.7	0.88
TMG2017_L_m	H4	bg_BG_1	bmin_1.14_bmax_1.16	MFD_double_GR	Set_1	TMG2017_L_mH4bg_BG_1bmin_1.14_bmax_1.16MFD_double_GRSet_1	sample_5	14.669	0.361	1	0.936	0.56	0.189222		0.8	0.7	0.9
TMG2017_L_m	H4	bg_BG_1	bmin_1.14_bmax_1.16	MFD_double_GR	Set_1	TMG2017_L_mH4bg_BG_1bmin_1.14_bmax_1.16MFD_double_GRSet_1	sample_6	15.428	0.534	1	0.899	0.56	0.268837		0.8	0.7	0.9
TMG2017_L_m	H4	bg_BG_1	bmin_1.14_bmax_1.16	MFD_double_GR	Set_1	TMG2017_L_mH4bg_BG_1bmin_1.14_bmax_1.16MFD_double_GRSet_1	sample_7	14.076	0.445	1	0.887	0.56	0.22104		0.8	0.7	0.92
TMG2017_L_m	H4	bg_BG_1	bmin_1.14_bmax_1.16	MFD_double_GR	Set_1	TMG2017_L_mH4bg_BG_1bmin_1.14_bmax_1.16MFD_double_GRSet_1	sample_8	14.098	0.4	1	0.799	0.56	0.178976		0.8	0.7	0.9
TMG2017_L_m	H4	bg_BG_1	bmin_1.14_bmax_1.16	MFD_double_GR	Set_1	TMG2017_L_mH4bg_BG_1bmin_1.14_bmax_1.16MFD_double_GRSet_1	sample_9	13.495	0.587	1	0.914	0.56	0.30045		0.8	0.7	0.92
TMG2017_L_m	H4	bg_BG_1	bmin_1.14_bmax_1.16	MFD_double_GR	Set_1	TMG2017_L_mH4bg_BG_1bmin_1.14_bmax_1.16MFD_double_GRSet_1	sample_10	14.049	0.289	1	0.908	0.56	0.146951		0.8	0.7	0.88
TMG2017_L_m	H4	bg_BG_2	bmin_1.14_bmax_1.16	MFD_double_GR	Set_1	TMG2017_L_mH4bg_BG_2bmin_1.14_bmax_1.16MFD_double_GRSet_1	sample_1	14.4	0.1	1	0.889	0.56	0.049784		0.8	0.7	0.66
TMG2017_L_m	H4	bg_BG_2	bmin_1.14_bmax_1.16	MFD_double_GR	Set_1	TMG2017_L_mH4bg_BG_2bmin_1.14_bmax_1.16MFD_double_GRSet_1	sample_2	15.344	0.029	1	0.875	0.56	0.01421		0.8	0.7	0.66
TMG2017_L_m	H4	bg_BG_2	bmin_1.14_bmax_1.16	MFD_double_GR	Set_1	TMG2017_L_mH4bg_BG_2bmin_1.14_bmax_1.16MFD_double_GRSet_1	sample_3	14.103	0.126	1	0.883	0.56	0.0623045		0.8	0.7	0.88
TMG2017_L_m	H4	bg_BG_2	bmin_1.14_bmax_1.16	MFD_double_GR	Set_1	TMG2017_L_mH4bg_BG_2bmin_1.14_bmax_1.16MFD_double_GRSet_1	sample_4	13.515	0.225	0.961	0.46	0.56	0.0556996		0.8	0.7	0.88
TMG2017_L_m	H4	bg_BG_2	bmin_1.14_bmax_1.16	MFD_double_GR	Set_1	TMG2017_L_mH4bg_BG_2bmin_1.14_bmax_1.16MFD_double_GRSet_1	sample_5	14.022	0.143	1	0.876	0.56	0.0701501		0.8	0.7	0.66
TMG2017_L_m	H4	bg_BG_2	bmin_1.14_bmax_1.16	MFD_double_GR	Set_1	TMG2017_L_mH4bg_BG_2bmin_1.14_bmax_1.16MFD_double_GRSet_1	sample_6	14.007	0.086	0.926	0.942	0.56	0.0420096		0.8	0.7	0.66
TMG2017_L_m	H4	bg_BG_2	bmin_1.14_bmax_1.16	MFD_double_GR	Set_1	TMG2017_L_mH4bg_BG_2bmin_1.14_bmax_1.16MFD_double_GRSet_1	sample_7	15.383	0.07	1	0.911	0.56	0.0357112		0.8	0.7	0.66
TMG2017_L_m	H4	bg_BG_2	bmin_1.14_bmax_1.16	MFD_double_GR	Set_1	TMG2017_L_mH4bg_BG_2bmin_1.14_bmax_1.16MFD_double_GRSet_1	sample_8	13.385	0.069	1	0.823	0.56	0.0318007		0.8	0.7	0.66
TMG2017_L_m	H4	bg_BG_2	bmin_1.14_bmax_1.16	MFD_double_GR	Set_1	TMG2017_L_mH4bg_BG_2bmin_1.14_bmax_1.16MFD_double_GRSet_1	sample_9	15.343	0.06	1	0.9	0.56	0.03024		0.8	0.7	0.66
TMG2017_L_m	H4	bg_BG_2	bmin_1.14_bmax_1.16	MFD_double_GR	Set_1	TMG2017_L_mH4bg_BG_2bmin_1.14_bmax_1.16MFD_double_GRSet_1	sample_10	13.506	0.121	0	0.296	0.56	0		0.8	0.7	0.66
TMG2017_L_m	H4	bg_BG_3	bmin_1.14_bmax_1.16	MFD_double_GR	Set_1	TMG2017_L_mH4bg_BG_3bmin_1.14_bmax_1.16MFD_double_GRSet_1	sample_1	14.4	0.38	1	0.904	0.56	0.192371		0.8	0.7	0.92
TMG2017_L_m	H4	bg_BG_3	bmin_1.14_bmax_1.16	MFD_double_GR	Set_1	TMG2017_L_mH4bg_BG_3bmin_1.14_bmax_1.16MFD_double_GRSet_1	sample_2	15.384	0.223	1	0.851	0.56	0.106273		0.8	0.7	0.88
TMG2017_L_m	H4	bg_BG_3	bmin_1.14_bmax_1.16	MFD_double_GR	Set_1	TMG2017_L_mH4bg_BG_3bmin_1.14_bmax_1.16MFD_double_GRSet_1	sample_3	13.464	0.607	1	0.794	0.56	0.269896		0.8	0.7	0.9
TMG2017_L_m	H4	bg_BG_3	bmin_1.14_bmax_1.16	MFD_double_GR	Set_1	TMG2017_L_mH4bg_BG_3bmin_1.14_bmax_1.16MFD_double_GRSet_1	sample_4	14.078	0.262	1	0.839	0.56	0.123098		0.8	0.7	0.88
TMG2017_L_m	H4	bg_BG_3	bmin_1.14_bmax_1.16	MFD_double_GR	Set_1	TMG2017_L_mH4bg_BG_3bmin_1.14_bmax_1.16MFD_double_GRSet_1	sample_5	14.759	0.42	0	0.891	0.56	0		0.8	0.7	0.92
TMG2017_L_m	H4	bg_BG_3	bmin_1.14_bmax_1.16	MFD_double_GR	Set_1	TMG2017_L_mH4bg_BG_3bmin_1.14_bmax_1.16MFD_double_GRSet_1	sample_6	14.023	0.302	0.934	0.835	0.56	0.131895		0.8	0.7	0.88
TMG2017_L_m	H4	bg_BG_3	bmin_1.14_bmax_1.16	MFD_double_GR	Set_1	TMG2017_L_mH4bg_BG_3bmin_1.14_bmax_1.16MFD_double_GRSet_1	sample_7	14.072	0.245	1	0.842	0.56	0.115522		0.8	0.7	0.66
TMG2017_L_m	H4	bg_BG_3	bmin_1.14_bmax_1.16	MFD_double_GR	Set_1	TMG2017_L_mH4bg_BG_3bmin_1.14_bmax_1.16MFD_double_GRSet_1	sample_8	14.059	0.235	0	0.88	0.56	0		0.8	0.7	0.88
TMG2017_L_m	H4	bg_BG_3	bmin_1.14_bmax_1.16	MFD_double_GR	Set_1	TMG2017_L_mH4bg_BG_3bmin_1.14_bmax_1.16MFD_double_GRSet_1	sample_9	14.673	0.357	1	0.839	0.56	0.167733		0.8	0.7	0.9
TMG2017_L_m	H4	bg_BG_3	bmin_1.14_bmax_1.16	MFD_double_GR	Set_1	TMG2017_L_mH4bg_BG_3bmin_1.14_bmax_1.16MFD_double_GRSet_1	sample_10	13.398	0.629	1	0.852	0.56	0.300108		0.8	0.7	0.9
TMG2017_L_m	H4	bg_BG_1	bmin_1.14_bmax_1.16	MFD_GR	Set_2	TMG2017_L_mH4bg_BG_1bmin_1.14_bmax_1.16MFD_GRSet_2	sample_1	14.4	0.808	0.67	0.81	0.06	0.0263101		0.2	0.3	0.66
TMG2017_L_m	H4	bg_BG_1	bmin_1.14_bmax_1.16	MFD_GR	Set_2	TMG2017_L_mH4bg_BG_1bmin_1.14_bmax_1.16MFD_GRSet_2	sample_2	13.484	0.654	1	0.801	0.06	0.0314312		0.2	0.3	0.66
TMG2017_L_m	H4	bg_BG_1	bmin_1.14_bmax_1.16	MFD_GR	Set_2	TMG2017_L_mH4bg_BG_1bmin_1.14_bmax_1.16MFD_GRSet_2	sample_3	13.402	0.844	0	0.752	0.06	0		0.2	0.3	0.66
TMG2017_L_m	H4	bg_BG_1	bmin_1.14_bmax_1.16	MFD_GR	Set_2	TMG2017_L_mH4bg_BG_1bmin_1.14_bmax_1.16MFD_GRSet_2	sample_4	14.703	0.793	0	0.469	0.06	0		0.2	0.3	0.66
TMG2017_L_m	H4	bg_BG_1	bmin_1.14_bmax_1.16	MFD_GR	Set_2	TMG2017_L_mH4bg_BG_1bmin_1.14_bmax_1.16MFD_GRSet_2	sample_5	15.367	0.821	0.938	0.773	0.06	0.0357171		0.2	0.3	0.88
TMG2017_L_m	H4	bg_BG_1	bmin_1.14_bmax_1.16	MFD_GR	Set_2	TMG2017_L_mH4bg_BG_1bmin_1.14_bmax_1.16MFD_GRSet_2	sample_6	13.995	0.788	0.972	0.596	0.06	0.0273899		0.2	0.3	0.66
TMG2017_L_m	H4	bg_BG_1	bmin_1.14_bmax_1.16	MFD_GR	Set_2	TMG2017_L_mH4bg_BG_1bmin_1.14_bmax_1.16MFD_GRSet_2	sample_7	13.425	0.764	0	0.204	0.06	0		0.2	0.3	0.66
TMG2017_L_m	H4	bg_BG_1	bmin_1.14_bmax_1.16	MFD_GR	Set_2	TMG2017_L_mH4bg_BG_1bmin_1.14_bmax_1.16MFD_GRSet_2	sample_8	15.398	0.543	0.89	0.539	0.06	0.015629		0.2	0.3	0.66
TMG2017_L_m	H4	bg_BG_1	bmin_1.14_bmax_1.16	MFD_GR	Set_2	TMG2017_L_mH4bg_BG_1bmin_1.14_bmax_1.16MFD_GRSet_2	sample_9	13.414	0.849	0	0.52	0.06	0		0.2	0.3	0.66
TMG2017_L_m	H4	bg_BG_1	bmin_1.14_bmax_1.16	MFD_GR	Set_2	TMG2017_L_mH4bg_BG_1bmin_1.14_bmax_1.16MFD_GRSet_2	sample_10	14.067	0.85	0.933	0.771	0.06	0.0366865		0.2	0.3	0.88
TMG2017_L_m	H4	bg_BG_2	bmin_1.14_bmax_1.16	MFD_GR	Set_2	TMG2017_L_mH4bg_BG_2bmin_1.14_bmax_1.16MFD_GRSet_2	sample_1	14.4	0.893	0.647	0.763	0.06	0.0264504		0.2	0.3	0.92
TMG2017_L_m	H4	bg_BG_2	bmin_1.14_bmax_1.16	MFD_GR	Set_2	TMG2017_L_mH4bg_BG_2bmin_1.14_bmax_1.16MFD_GRSet_2	sample_2	13.488	0.949	0.988	0.622	0.06	0.0349917		0.2	0.3	0.66
TMG2017_L_m	H4	bg_BG_2	bmin_1.14_bmax_1.16	MFD_GR	Set_2	TMG2017_L_mH4bg_BG_2bmin_1.14_bmax_1.16MFD_GRSet_2	sample_3	14.12	0.884	0	0.735	0.06	0		0.2	0.3	0.92
TMG2017_L_m	H4	bg_BG_2	bmin_1.14_bmax_1.16	MFD_GR	Set_2	TMG2017_L_mH4bg_BG_2bmin_1.14_bmax_1.16MFD_GRSet_2	sample_4	14.66	0.884	1	0.575	0.06	0.030498		0.2	0.3	0.92
TMG2017_L_m	H4	bg_BG_2	bmin_1.14_bmax_1.16	MFD_GR	Set_2	TMG2017_L_mH4bg_BG_2bmin_1.14_bmax_1.16MFD_GRSet_2	sample_5	15.361	0.883	0.878	0.53	0.06	0.0246537		0.2	0.3	0.92
TMG2017_L_m	H4	bg_BG_2	bmin_1.14_bmax_1.16	MFD_GR	Set_2	TMG2017_L_mH4bg_BG_2bmin_1.14_bmax_1.16MFD_GRSet_2	sample_6	14.082	0.727	0	0.476	0.06	0		0.2	0.3	0.9
TMG2017_L_m	H4	bg_BG_2	bmin_1.14_bmax_1.16	MFD_GR	Set_2	TMG2017_L_mH4bg_BG_2bmin_1.14_bmax_1.16MFD_GRSet_2	sample_7	13.487	0.313	1	0.784	0.06	0.0147235		0.2	0.3	0.96
TMG2017_L_m	H4	bg_BG_2	bmin_1.14_bmax_1.16	MFD_GR	Set_2	TMG2017_L_mH4bg_BG_2bmin_1.14_bmax_1.16MFD_GRSet_2	sample_8	15.414	0.509	0.951	0.836	0.06	0.0242804		0.2	0.3	0.96
TMG2017_L_m	H4	bg_BG_2	bmin_1.14_bmax_1.16	MFD_GR	Set_2	TMG2017_L_mH4bg_BG_2bmin_1.14_bmax_1.16MFD_GRSet_2	sample_9	14.693	0.901	1	0.371	0.06	0.0200563		0.2	0.3	0.92
TMG2017_L_m	H4	bg_BG_2	bmin_1.14_bmax_1.16	MFD_GR	Set_2	TMG2017_L_mH4bg_BG_2bmin_1.14_bmax_1.16MFD_GRSet_2	sample_10	13.367	0.912	1	0.768	0.06	0.042025		0.2	0.3	0.88
TMG2017_L_m	H4	bg_BG_3	bmin_1.14_bmax_1.16	MFD_GR	Set_2	TMG2017_L_mH4bg_BG_3bmin_1.14_bmax_1.16MFD_GRSet_2	sample_1	14.4	0.742	0.603	0.713	0.06	0.0191409		0.2	0.3	0.66
TMG2017_L_m	H4	bg_BG_3	bmin_1.14_bmax_1.16	MFD_GR	Set_2	TMG2017_L_mH4bg_BG_3bmin_1.14_bmax_1.16MFD_GRSet_2	sample_2	14.045	0.837	0	0.646	0.06	0		0.2	0.3	0.66
TMG2017_L_m	H4	bg_BG_3	bmin_1.14_bmax_1.16	MFD_GR	Set_2	TMG2017_L_mH4bg_BG_3bmin_1.14_bmax_1.16MFD_GRSet_2	sample_3	15.36	0.133	0	0.6	0.06	0		0.2	0.3	0.28
TMG2017_L_m	H4	bg_BG_3	bmin_1.14_bmax_1.16	MFD_GR	Set_2	TMG2017_L_mH4bg_BG_3bmin_1.14_bmax_1.16MFD_GRSet_2	sample_4	14.776	0.874	0.572	0.706	0.06	0.021177		0.2	0.3	0.92
TMG2017_L_m	H4	bg_BG_3	bmin_1.14_bmax_1.16	MFD_GR	Set_2	TMG2017_L_mH4bg_BG_3bmin_1.14_bmax_1.16MFD_GRSet_2	sample_5	14.739	0.176	0	0.76	0.06	0		0.2	0.3	0.28
TMG2017_L_m	H4	bg_BG_3	bmin_1.14_bmax_1.16	MFD_GR	Set_2	TMG2017_L_mH4bg_BG_3bmin_1.14_bmax_1.16MFD_GRSet_2	sample_6	14.123	0.882	0	0.481	0.06	0		0.2	0.3	0.88
TMG2017_L_m	H4	bg_BG_3	bmin_1.14_bmax_1.16	MFD_GR	Set_2	TMG2017_L_mH4bg_BG_3bmin_1.14_bmax_1.16MFD_GRSet_2	sample_7	15.347	0.736	0	0.543	0.06	0		0.2	0.3	0.88
TMG2017_L_m	H4	bg_BG_3	bmin_1.14_bmax_1.16	MFD_GR	Set_2	TMG2017_L_mH4bg_BG_3bmin_1.14_bmax_1.16MFD_GRSet_2	sample_8	15.336	0.458	0.767	0.587	0.06	0.0123723		0.2	0.3	0.66
TMG2017_L_m	H4	bg_BG_3	bmin_1.14_bmax_1.16	MFD_GR	Set_2	TMG2017_L_mH4bg_BG_3bmin_1.14_bmax_1.16MFD_GRSet_2	sample_9	13.458	0.822	0	0.523	0.06	0		0.2	0.3	0.66
TMG2017_L_m	H4	bg_BG_3	bmin_1.14_bmax_1.16	MFD_GR	Set_2	TMG2017_L_mH4bg_BG_3bmin_1.14_bmax_1.16MFD_GRSet_2	sample_10	13.418	0.835	0	0.634	0.06	0		0.2	0.3	0.92
TMG2017_L_m	H4	bg_BG_1	bmin_1.14_bmax_1.16	MFD_double_GR	Set_2	TMG2017_L_mH4bg_BG_1bmin_1.14_bmax_1.16MFD_double_GRSet_2	sample_1	14.4	0.894	0	0.793	0.24	0		0.8	0.3	0.92
TMG2017_L_m	H4	bg_BG_1	bmin_1.14_bmax_1.16	MFD_double_GR	Set_2	TMG2017_L_mH4bg_BG_1bmin_1.14_bmax_1.16MFD_double_GRSet_2	sample_2	14.108	0.871	0	0.815	0.24	0		0.8	0.3	0.92
TMG2017_L_m	H4	bg_BG_1	bmin_1.14_bmax_1.16	MFD_double_GR	Set_2	TMG2017_L_mH4bg_BG_1bmin_1.14_bmax_1.16MFD_double_GRSet_2	sample_3	15.459	0.851	0.548	0.767	0.24	0.0858453		0.8	0.3	0.66
TMG2017_L_m	H4	bg_BG_1	bmin_1.14_bmax_1.16	MFD_double_GR	Set_2	TMG2017_L_mH4bg_BG_1bmin_1.14_bmax_1.16MFD_double_GRSet_2	sample_4	13.461	0.791	0	0.748	0.24	0		0.8	0.3	0.92
TMG2017_L_m	H4	bg_BG_1	bmin_1.14_bmax_1.16	MFD_double_GR	Set_2	TMG2017_L_mH4bg_BG_1bmin_1.14_bmax_1.16MFD_double_GRSet_2	sample_5	15.358	0.537	0	0.755	0.24	0		0.8	0.3	0.96
TMG2017_L_m	H4	bg_BG_1	bmin_1.14_bmax_1.16	MFD_double_GR	Set_2	TMG2017_L_mH4bg_BG_1bmin_1.14_bmax_1.16MFD_double_GRSet_2	sample_6	14.064	0.819	0	0.516	0.24	0		0.8	0.3	0.92
TMG2017_L_m	H4	bg_BG_1	bmin_1.14_bmax_1.16	MFD_double_GR	Set_2	TMG2017_L_mH4bg_BG_1bmin_1.14_bmax_1.16MFD_double_GRSet_2	sample_7	13.474	0.926	0	0.204	0.24	0		0.8	0.3	0.88
TMG2017_L_m	H4	bg_BG_1	bmin_1.14_bmax_1.16	MFD_double_GR	Set_2	TMG2017_L_mH4bg_BG_1bmin_1.14_bmax_1.16MFD_double_GRSet_2	sample_8	13.439	0.933	0	0.215	0.24	0		0.8	0.3	0.9
TMG2017_L_m	H4	bg_BG_1	bmin_1.14_bmax_1.16	MFD_double_GR	Set_2	TMG2017_L_mH4bg_BG_1bmin_1.14_bmax_1.16MFD_double_GRSet_2	sample_9	14.113	0.828	0	0.802	0.24	0		0.8	0.3	0.92
TMG2017_L_m	H4	bg_BG_1	bmin_1.14_bmax_1.16	MFD_double_GR	Set_2	TMG2017_L_mH4bg_BG_1bmin_1.14_bmax_1.16MFD_double_GRSet_2	sample_10	14.709	0.928	0	0.68	0.24	0		0.8	0.3	0.66
TMG2017_L_m	H4	bg_BG_2	bmin_1.14_bmax_1.16	MFD_double_GR	Set_2	TMG2017_L_mH4bg_BG_2bmin_1.14_bmax_1.16MFD_double_GRSet_2	sample_1	14.4	0.752	0	0.766	0.24	0		0.8	0.3	0.66
TMG2017_L_m	H4	bg_BG_2	bmin_1.14_bmax_1.16	MFD_double_GR	Set_2	TMG2017_L_mH4bg_BG_2bmin_1.14_bmax_1.16MFD_double_GRSet_2	sample_2	13.414	0.831	0	0.671	0.24	0		0.8	0.3	0.88
TMG2017_L_m	H4	bg_BG_2	bmin_1.14_bmax_1.16	MFD_double_GR	Set_2	TMG2017_L_mH4bg_BG_2bmin_1.14_bmax_1.16MFD_double_GRSet_2	sample_3	14.73	0.478	0	0.716	0.24	0		0.8	0.3	0.66
TMG2017_L_m	H4	bg_BG_2	bmin_1.14_bmax_1.16	MFD_double_GR	Set_2	TMG2017_L_mH4bg_BG_2bmin_1.14_bmax_1.16MFD_double_GRSet_2	sample_4	13.454	0.811	0	0.359	0.24	0		0.8	0.3	0.88
TMG2017_L_m	H4	bg_BG_2	bmin_1.14_bmax_1.16	MFD_double_GR	Set_2	TMG2017_L_mH4bg_BG_2bmin_1.14_bmax_1.16MFD_double_GRSet_2	sample_5	15.322	0.834	0	0.217	0.24	0		0.8	0.3	0.88
TMG2017_L_m	H4	bg_BG_2	bmin_1.14_bmax_1.16	MFD_double_GR	Set_2	TMG2017_L_mH4bg_BG_2bmin_1.14_bmax_1.16MFD_double_GRSet_2	sample_6	13.463	0.705	0	0.244	0.24	0		0.8	0.3	0.28
TMG2017_L_m	H4	bg_BG_2	bmin_1.14_bmax_1.16	MFD_double_GR	Set_2	TMG2017_L_mH4bg_BG_2bmin_1.14_bmax_1.16MFD_double_GRSet_2	sample_7	15.353	0.222	0	0.79	0.24	0		0.8	0.3	0.66
TMG2017_L_m	H4	bg_BG_2	bmin_1.14_bmax_1.16	MFD_double_GR	Set_2	TMG2017_L_mH4bg_BG_2bmin_1.14_bmax_1.16MFD_double_GRSet_2	sample_8	14.622	0.431	0	0.802	0.24	0		0.8	0.3	0.66
TMG2017_L_m	H4	bg_BG_2	bmin_1.14_bmax_1.16	MFD_double_GR	Set_2	TMG2017_L_mH4bg_BG_2bmin_1.14_bmax_1.16MFD_double_GRSet_2	sample_9	14.208	0.502	0	0.286	0.24	0		0.8	0.3	0.28
TMG2017_L_m	H4	bg_BG_2	bmin_1.14_bmax_1.16	MFD_double_GR	Set_2	TMG2017_L_mH4bg_BG_2bmin_1.14_bmax_1.16MFD_double_GRSet_2	sample_10	13.425	0.581	0	0.748	0.24	0		0.8	0.3	0.66
TMG2017_L_m	H4	bg_BG_3	bmin_1.14_bmax_1.16	MFD_double_GR	Set_2	TMG2017_L_mH4bg_BG_3bmin_1.14_bmax_1.16MFD_double_GRSet_2	sample_1	14.4	0.884	0	0.698	0.24	0		0.8	0.3	0.92
TMG2017_L_m	H4	bg_BG_3	bmin_1.14_bmax_1.16	MFD_double_GR	Set_2	TMG2017_L_mH4bg_BG_3bmin_1.14_bmax_1.16MFD_double_GRSet_2	sample_2	13.394	0.87	0	0.649	0.24	0		0.8	0.3	0.92
TMG2017_L_m	H4	bg_BG_3	bmin_1.14_bmax_1.16	MFD_double_GR	Set_2	TMG2017_L_mH4bg_BG_3bmin_1.14_bmax_1.16MFD_double_GRSet_2	sample_3	13.432	0.945	0	0.771	0.24	0		0.8	0.3	0.66
TMG2017_L_m	H4	bg_BG_3	bmin_1.14_bmax_1.16	MFD_double_GR	Set_2	TMG2017_L_mH4bg_BG_3bmin_1.14_bmax_1.16MFD_double_GRSet_2	sample_4	14.712	0.767	0	0.609	0.24	0		0.8	0.3	0.9
TMG2017_L_m	H4	bg_BG_3	bmin_1.14_bmax_1.16	MFD_double_GR	Set_2	TMG2017_L_mH4bg_BG_3bmin_1.14_bmax_1.16MFD_double_GRSet_2	sample_5	14.032	0.876	0	0.731	0.24	0		0.8	0.3	0.92
TMG2017_L_m	H4	bg_BG_3	bmin_1.14_bmax_1.16	MFD_double_GR	Set_2	TMG2017_L_mH4bg_BG_3bmin_1.14_bmax_1.16MFD_double_GRSet_2	sample_6	14.089	0.746	0	0.27	0.24	0		0.8	0.3	0.9
TMG2017_L_m	H4	bg_BG_3	bmin_1.14_bmax_1.16	MFD_double_GR	Set_2	TMG2017_L_mH4bg_BG_3bmin_1.14_bmax_1.16MFD_double_GRSet_2	sample_7	13.443	0.654	0	0.308	0.24	0		0.8	0.3	0.9
TMG2017_L_m	H4	bg_BG_3	bmin_1.14_bmax_1.16	MFD_double_GR	Set_2	TMG2017_L_mH4bg_BG_3bmin_1.14_bmax_1.16MFD_double_GRSet_2	sample_8	14.68	0.855	0	0.379	0.24	0		0.8	0.3	0.92
TMG2017_L_m	H4	bg_BG_3	bmin_1.14_bmax_1.16	MFD_double_GR	Set_2	TMG2017_L_mH4bg_BG_3bmin_1.14_bmax_1.16MFD_double_GRSet_2	sample_9	15.391	0.877	0	0.245	0.24	0		0.8	0.3	0.92
TMG2017_L_m	H4	bg_BG_3	bmin_1.14_bmax_1.16	MFD_double_GR	Set_2	TMG2017_L_mH4bg_BG_3bmin_1.14_bmax_1.16MFD_double_GRSet_2	sample_10	13.42	0.832	0	0.547	0.24	0		0.8	0.3	0.92
TMG2017_L_m	H5	bg_BG_1	bmin_1.14_bmax_1.16	MFD_GR	Set_1	TMG2017_L_mH5bg_BG_1bmin_1.14_bmax_1.16MFD_GRSet_1	sample_1	16.809	0.113	1	0.899	0.14	0.0142222		0.2	0.7	0.6
TMG2017_L_m	H5	bg_BG_1	bmin_1.14_bmax_1.16	MFD_GR	Set_1	TMG2017_L_mH5bg_BG_1bmin_1.14_bmax_1.16MFD_GRSet_1	sample_2	15.774	0.177	1	0.913	0.14	0.0226241		0.2	0.7	0.6
TMG2017_L_m	H5	bg_BG_1	bmin_1.14_bmax_1.16	MFD_GR	Set_1	TMG2017_L_mH5bg_BG_1bmin_1.14_bmax_1.16MFD_GRSet_1	sample_3	17.863	0.067	1	0.872	0.14	0.00817936		0.2	0.7	0.6
TMG2017_L_m	H5	bg_BG_1	bmin_1.14_bmax_1.16	MFD_GR	Set_1	TMG2017_L_mH5bg_BG_1bmin_1.14_bmax_1.16MFD_GRSet_1	sample_4	17.263	0.355	1	0.72	0.14	0.035784		0.2	0.7	0.86
TMG2017_L_m	H5	bg_BG_1	bmin_1.14_bmax_1.16	MFD_GR	Set_1	TMG2017_L_mH5bg_BG_1bmin_1.14_bmax_1.16MFD_GRSet_1	sample_5	17.937	0.121	1	0.909	0.14	0.0153985		0.2	0.7	0.6
TMG2017_L_m	H5	bg_BG_1	bmin_1.14_bmax_1.16	MFD_GR	Set_1	TMG2017_L_mH5bg_BG_1bmin_1.14_bmax_1.16MFD_GRSet_1	sample_6	17.859	0.106	1	0.939	0.14	0.0139348		0.2	0.7	0.6
TMG2017_L_m	H5	bg_BG_1	bmin_1.14_bmax_1.16	MFD_GR	Set_1	TMG2017_L_mH5bg_BG_1bmin_1.14_bmax_1.16MFD_GRSet_1	sample_7	17.19	0.131	1	0.917	0.14	0.0168178		0.2	0.7	0.6
TMG2017_L_m	H5	bg_BG_1	bmin_1.14_bmax_1.16	MFD_GR	Set_1	TMG2017_L_mH5bg_BG_1bmin_1.14_bmax_1.16MFD_GRSet_1	sample_8	17.152	0.292	1	0.727	0.14	0.0297198		0.2	0.7	0.8
TMG2017_L_m	H5	bg_BG_1	bmin_1.14_bmax_1.16	MFD_GR	Set_1	TMG2017_L_mH5bg_BG_1bmin_1.14_bmax_1.16MFD_GRSet_1	sample_9	15.682	0.211	1	0.883	0.14	0.0260838		0.2	0.7	0.6
TMG2017_L_m	H5	bg_BG_1	bmin_1.14_bmax_1.16	MFD_GR	Set_1	TMG2017_L_mH5bg_BG_1bmin_1.14_bmax_1.16MFD_GRSet_1	sample_10	15.697	0.231	1	0.859	0.14	0.0277801		0.2	0.7	0.78
TMG2017_L_m	H5	bg_BG_2	bmin_1.14_bmax_1.16	MFD_GR	Set_1	TMG2017_L_mH5bg_BG_2bmin_1.14_bmax_1.16MFD_GRSet_1	sample_1	16.809	0.315	1	0.887	0.14	0.0391167		0.2	0.7	0.86
TMG2017_L_m	H5	bg_BG_2	bmin_1.14_bmax_1.16	MFD_GR	Set_1	TMG2017_L_mH5bg_BG_2bmin_1.14_bmax_1.16MFD_GRSet_1	sample_2	17.868	0.282	1	0.804	0.14	0.0317419		0.2	0.7	0.86
TMG2017_L_m	H5	bg_BG_2	bmin_1.14_bmax_1.16	MFD_GR	Set_1	TMG2017_L_mH5bg_BG_2bmin_1.14_bmax_1.16MFD_GRSet_1	sample_3	16.448	0.346	1	0.923	0.14	0.0447101		0.2	0.7	0.86
TMG2017_L_m	H5	bg_BG_2	bmin_1.14_bmax_1.16	MFD_GR	Set_1	TMG2017_L_mH5bg_BG_2bmin_1.14_bmax_1.16MFD_GRSet_1	sample_4	16.541	0.362	1	0.803	0.14	0.040696		0.2	0.7	0.8
TMG2017_L_m	H5	bg_BG_2	bmin_1.14_bmax_1.16	MFD_GR	Set_1	TMG2017_L_mH5bg_BG_2bmin_1.14_bmax_1.16MFD_GRSet_1	sample_5	16.392	0.501	1	0.905	0.14	0.0634767		0.2	0.7	0.96
TMG2017_L_m	H5	bg_BG_2	bmin_1.14_bmax_1.16	MFD_GR	Set_1	TMG2017_L_mH5bg_BG_2bmin_1.14_bmax_1.16MFD_GRSet_1	sample_6	15.728	0.444	1	0.924	0.14	0.0574358		0.2	0.7	0.8
TMG2017_L_m	H5	bg_BG_2	bmin_1.14_bmax_1.16	MFD_GR	Set_1	TMG2017_L_mH5bg_BG_2bmin_1.14_bmax_1.16MFD_GRSet_1	sample_7	17.847	0.224	1	0.926	0.14	0.0290394		0.2	0.7	0.8
TMG2017_L_m	H5	bg_BG_2	bmin_1.14_bmax_1.16	MFD_GR	Set_1	TMG2017_L_mH5bg_BG_2bmin_1.14_bmax_1.16MFD_GRSet_1	sample_8	17.832	0.26	1	0.834	0.14	0.0303576		0.2	0.7	0.86
TMG2017_L_m	H5	bg_BG_2	bmin_1.14_bmax_1.16	MFD_GR	Set_1	TMG2017_L_mH5bg_BG_2bmin_1.14_bmax_1.16MFD_GRSet_1	sample_9	16.493	0.293	1	0.898	0.14	0.036836		0.2	0.7	0.8
TMG2017_L_m	H5	bg_BG_2	bmin_1.14_bmax_1.16	MFD_GR	Set_1	TMG2017_L_mH5bg_BG_2bmin_1.14_bmax_1.16MFD_GRSet_1	sample_10	15.816	0.344	1	0.876	0.14	0.0421882		0.2	0.7	0.86
TMG2017_L_m	H5	bg_BG_3	bmin_1.14_bmax_1.16	MFD_GR	Set_1	TMG2017_L_mH5bg_BG_3bmin_1.14_bmax_1.16MFD_GRSet_1	sample_1	16.809	0.099	1	0.859	0.14	0.0119057		0.2	0.7	0.6
TMG2017_L_m	H5	bg_BG_3	bmin_1.14_bmax_1.16	MFD_GR	Set_1	TMG2017_L_mH5bg_BG_3bmin_1.14_bmax_1.16MFD_GRSet_1	sample_2	17.157	0.298	1	0.872	0.14	0.0363798		0.2	0.7	0.8
TMG2017_L_m	H5	bg_BG_3	bmin_1.14_bmax_1.16	MFD_GR	Set_1	TMG2017_L_mH5bg_BG_3bmin_1.14_bmax_1.16MFD_GRSet_1	sample_3	17.798	0.157	1	0.859	0.14	0.0188808		0.2	0.7	0.78
TMG2017_L_m	H5	bg_BG_3	bmin_1.14_bmax_1.16	MFD_GR	Set_1	TMG2017_L_mH5bg_BG_3bmin_1.14_bmax_1.16MFD_GRSet_1	sample_4	16.385	0.322	1	0.918	0.14	0.0413834		0.2	0.7	0.8
TMG2017_L_m	H5	bg_BG_3	bmin_1.14_bmax_1.16	MFD_GR	Set_1	TMG2017_L_mH5bg_BG_3bmin_1.14_bmax_1.16MFD_GRSet_1	sample_5	15.793	0.105	1	0.871	0.14	0.0128037		0.2	0.7	0.6
TMG2017_L_m	H5	bg_BG_3	bmin_1.14_bmax_1.16	MFD_GR	Set_1	TMG2017_L_mH5bg_BG_3bmin_1.14_bmax_1.16MFD_GRSet_1	sample_6	16.433	0.161	1	0.866	0.14	0.0195196		0.2	0.7	0.6
TMG2017_L_m	H5	bg_BG_3	bmin_1.14_bmax_1.16	MFD_GR	Set_1	TMG2017_L_mH5bg_BG_3bmin_1.14_bmax_1.16MFD_GRSet_1	sample_7	16.419	0.175	1	0.835	0.14	0.0204575		0.2	0.7	0.6
TMG2017_L_m	H5	bg_BG_3	bmin_1.14_bmax_1.16	MFD_GR	Set_1	TMG2017_L_mH5bg_BG_3bmin_1.14_bmax_1.16MFD_GRSet_1	sample_8	16.495	0.156	1	0.873	0.14	0.0190663		0.2	0.7	0.6
TMG2017_L_m	H5	bg_BG_3	bmin_1.14_bmax_1.16	MFD_GR	Set_1	TMG2017_L_mH5bg_BG_3bmin_1.14_bmax_1.16MFD_GRSet_1	sample_9	17.914	0.083	1	0.895	0.14	0.0103999		0.2	0.7	0.24
TMG2017_L_m	H5	bg_BG_3	bmin_1.14_bmax_1.16	MFD_GR	Set_1	TMG2017_L_mH5bg_BG_3bmin_1.14_bmax_1.16MFD_GRSet_1	sample_10	17.909	0.086	1	0.828	0.14	0.00996912		0.2	0.7	0.6
TMG2017_L_m	H5	bg_BG_1	bmin_1.14_bmax_1.16	MFD_double_GR	Set_1	TMG2017_L_mH5bg_BG_1bmin_1.14_bmax_1.16MFD_double_GRSet_1	sample_1	16.809	0.326	1	0.874	0.56	0.159557		0.8	0.7	0.86
TMG2017_L_m	H5	bg_BG_1	bmin_1.14_bmax_1.16	MFD_double_GR	Set_1	TMG2017_L_mH5bg_BG_1bmin_1.14_bmax_1.16MFD_double_GRSet_1	sample_2	16.467	0.137	1	0.935	0.56	0.0717332		0.8	0.7	0.6
TMG2017_L_m	H5	bg_BG_1	bmin_1.14_bmax_1.16	MFD_double_GR	Set_1	TMG2017_L_mH5bg_BG_1bmin_1.14_bmax_1.16MFD_double_GRSet_1	sample_3	15.782	0.422	1	0.841	0.56	0.198745		0.8	0.7	0.86
TMG2017_L_m	H5	bg_BG_1	bmin_1.14_bmax_1.16	MFD_double_GR	Set_1	TMG2017_L_mH5bg_BG_1bmin_1.14_bmax_1.16MFD_double_GRSet_1	sample_4	17.864	0.296	1	0.866	0.56	0.143548		0.8	0.7	0.86
TMG2017_L_m	H5	bg_BG_1	bmin_1.14_bmax_1.16	MFD_double_GR	Set_1	TMG2017_L_mH5bg_BG_1bmin_1.14_bmax_1.16MFD_double_GRSet_1	sample_5	16.469	0.282	1	0.913	0.56	0.144181		0.8	0.7	0.8
TMG2017_L_m	H5	bg_BG_1	bmin_1.14_bmax_1.16	MFD_double_GR	Set_1	TMG2017_L_mH5bg_BG_1bmin_1.14_bmax_1.16MFD_double_GRSet_1	sample_6	16.525	0.29	1	0.936	0.56	0.152006		0.8	0.7	0.86
TMG2017_L_m	H5	bg_BG_1	bmin_1.14_bmax_1.16	MFD_double_GR	Set_1	TMG2017_L_mH5bg_BG_1bmin_1.14_bmax_1.16MFD_double_GRSet_1	sample_7	17.172	0.377	1	0.911	0.56	0.19233		0.8	0.7	0.96
TMG2017_L_m	H5	bg_BG_1	bmin_1.14_bmax_1.16	MFD_double_GR	Set_1	TMG2017_L_mH5bg_BG_1bmin_1.14_bmax_1.16MFD_double_GRSet_1	sample_8	17.207	0.318	1	0.619	0.56	0.110232		0.8	0.7	0.86
TMG2017_L_m	H5	bg_BG_1	bmin_1.14_bmax_1.16	MFD_double_GR	Set_1	TMG2017_L_mH5bg_BG_1bmin_1.14_bmax_1.16MFD_double_GRSet_1	sample_9	16.437	0.281	1	0.877	0.56	0.138005		0.8	0.7	0.8
TMG2017_L_m	H5	bg_BG_1	bmin_1.14_bmax_1.16	MFD_double_GR	Set_1	TMG2017_L_mH5bg_BG_1bmin_1.14_bmax_1.16MFD_double_GRSet_1	sample_10	16.457	0.303	1	0.822	0.56	0.139477		0.8	0.7	0.86
TMG2017_L_m	H5	bg_BG_2	bmin_1.14_bmax_1.16	MFD_double_GR	Set_1	TMG2017_L_mH5bg_BG_2bmin_1.14_bmax_1.16MFD_double_GRSet_1	sample_1	16.809	0.099	1	0.851	0.56	0.0471794		0.8	0.7	0.6
TMG2017_L_m	H5	bg_BG_2	bmin_1.14_bmax_1.16	MFD_double_GR	Set_1	TMG2017_L_mH5bg_BG_2bmin_1.14_bmax_1.16MFD_double_GRSet_1	sample_2	15.792	0.167	1	0.854	0.56	0.0798661		0.8	0.7	0.6
TMG2017_L_m	H5	bg_BG_2	bmin_1.14_bmax_1.16	MFD_double_GR	Set_1	TMG2017_L_mH5bg_BG_2bmin_1.14_bmax_1.16MFD_double_GRSet_1	sample_3	16.435	0.096	1	0.935	0.56	0.0502656		0.8	0.7	0.24
TMG2017_L_m	H5	bg_BG_2	bmin_1.14_bmax_1.16	MFD_double_GR	Set_1	TMG2017_L_mH5bg_BG_2bmin_1.14_bmax_1.16MFD_double_GRSet_1	sample_4	16.505	0.102	1	0.842	0.56	0.048095		0.8	0.7	0.6
TMG2017_L_m	H5	bg_BG_2	bmin_1.14_bmax_1.16	MFD_double_GR	Set_1	TMG2017_L_mH5bg_BG_2bmin_1.14_bmax_1.16MFD_double_GRSet_1	sample_5	16.474	0.12	1	0.903	0.56	0.0606816		0.8	0.7	0.6
TMG2017_L_m	H5	bg_BG_2	bmin_1.14_bmax_1.16	MFD_double_GR	Set_1	TMG2017_L_mH5bg_BG_2bmin_1.14_bmax_1.16MFD_double_GRSet_1	sample_6	17.856	0.067	1	0.913	0.56	0.0342558		0.8	0.7	0.6
TMG2017_L_m	H5	bg_BG_2	bmin_1.14_bmax_1.16	MFD_double_GR	Set_1	TMG2017_L_mH5bg_BG_2bmin_1.14_bmax_1.16MFD_double_GRSet_1	sample_7	15.72	0.102	1	0.938	0.56	0.0535786		0.8	0.7	0.24
TMG2017_L_m	H5	bg_BG_2	bmin_1.14_bmax_1.16	MFD_double_GR	Set_1	TMG2017_L_mH5bg_BG_2bmin_1.14_bmax_1.16MFD_double_GRSet_1	sample_8	15.839	0.204	1	0.747	0.56	0.0853373		0.8	0.7	0.78
TMG2017_L_m	H5	bg_BG_2	bmin_1.14_bmax_1.16	MFD_double_GR	Set_1	TMG2017_L_mH5bg_BG_2bmin_1.14_bmax_1.16MFD_double_GRSet_1	sample_9	17.146	0.01	1	0.92	0.56	0.005152		0.8	0.7	0.6
TMG2017_L_m	H5	bg_BG_2	bmin_1.14_bmax_1.16	MFD_double_GR	Set_1	TMG2017_L_mH5bg_BG_2bmin_1.14_bmax_1.16MFD_double_GRSet_1	sample_10	17.891	0.11	1	0.867	0.56	0.0534072		0.8	0.7	0.6
TMG2017_L_m	H5	bg_BG_3	bmin_1.14_bmax_1.16	MFD_double_GR	Set_1	TMG2017_L_mH5bg_BG_3bmin_1.14_bmax_1.16MFD_double_GRSet_1	sample_1	16.809	0.26	1	0.839	0.56	0.122158		0.8	0.7	0.86
TMG2017_L_m	H5	bg_BG_3	bmin_1.14_bmax_1.16	MFD_double_GR	Set_1	TMG2017_L_mH5bg_BG_3bmin_1.14_bmax_1.16MFD_double_GRSet_1	sample_2	17.943	0.233	1	0.852	0.56	0.111169		0.8	0.7	0.86
TMG2017_L_m	H5	bg_BG_3	bmin_1.14_bmax_1.16	MFD_double_GR	Set_1	TMG2017_L_mH5bg_BG_3bmin_1.14_bmax_1.16MFD_double_GRSet_1	sample_3	17.852	0.344	1	0.842	0.56	0.162203		0.8	0.7	0.96
TMG2017_L_m	H5	bg_BG_3	bmin_1.14_bmax_1.16	MFD_double_GR	Set_1	TMG2017_L_mH5bg_BG_3bmin_1.14_bmax_1.16MFD_double_GRSet_1	sample_4	16.434	0.231	1	0.914	0.56	0.118235		0.8	0.7	0.8
TMG2017_L_m	H5	bg_BG_3	bmin_1.14_bmax_1.16	MFD_double_GR	Set_1	TMG2017_L_mH5bg_BG_3bmin_1.14_bmax_1.16MFD_double_GRSet_1	sample_5	16.605	0.279	1	0.857	0.56	0.133898		0.8	0.7	0.86
TMG2017_L_m	H5	bg_BG_3	bmin_1.14_bmax_1.16	MFD_double_GR	Set_1	TMG2017_L_mH5bg_BG_3bmin_1.14_bmax_1.16MFD_double_GRSet_1	sample_6	15.723	0.317	1	0.843	0.56	0.149649		0.8	0.7	0.8
TMG2017_L_m	H5	bg_BG_3	bmin_1.14_bmax_1.16	MFD_double_GR	Set_1	TMG2017_L_mH5bg_BG_3bmin_1.14_bmax_1.16MFD_double_GRSet_1	sample_7	17.15	0.239	1	0.843	0.56	0.112827		0.8	0.7	0.86
TMG2017_L_m	H5	bg_BG_3	bmin_1.14_bmax_1.16	MFD_double_GR	Set_1	TMG2017_L_mH5bg_BG_3bmin_1.14_bmax_1.16MFD_double_GRSet_1	sample_8	16.431	0.406	1	0.861	0.56	0.195757		0.8	0.7	0.96
TMG2017_L_m	H5	bg_BG_3	bmin_1.14_bmax_1.16	MFD_double_GR	Set_1	TMG2017_L_mH5bg_BG_3bmin_1.14_bmax_1.16MFD_double_GRSet_1	sample_9	16.446	0.298	1	0.909	0.56	0.151694		0.8	0.7	0.8
TMG2017_L_m	H5	bg_BG_3	bmin_1.14_bmax_1.16	MFD_double_GR	Set_1	TMG2017_L_mH5bg_BG_3bmin_1.14_bmax_1.16MFD_double_GRSet_1	sample_10	15.801	0.408	1	0.78	0.56	0.178214		0.8	0.7	0.86
TMG2017_L_m	H5	bg_BG_1	bmin_1.14_bmax_1.16	MFD_GR	Set_2	TMG2017_L_mH5bg_BG_1bmin_1.14_bmax_1.16MFD_GRSet_2	sample_1	16.809	0.664	1	0.882	0.06	0.0351389		0.2	0.3	0.6
TMG2017_L_m	H5	bg_BG_1	bmin_1.14_bmax_1.16	MFD_GR	Set_2	TMG2017_L_mH5bg_BG_1bmin_1.14_bmax_1.16MFD_GRSet_2	sample_2	16.559	0.842	1	0.866	0.06	0.0437503		0.2	0.3	0.78
TMG2017_L_m	H5	bg_BG_1	bmin_1.14_bmax_1.16	MFD_GR	Set_2	TMG2017_L_mH5bg_BG_1bmin_1.14_bmax_1.16MFD_GRSet_2	sample_3	16.456	0.704	1	0.752	0.06	0.0317645		0.2	0.3	0.6
TMG2017_L_m	H5	bg_BG_1	bmin_1.14_bmax_1.16	MFD_GR	Set_2	TMG2017_L_mH5bg_BG_1bmin_1.14_bmax_1.16MFD_GRSet_2	sample_4	15.702	0.7	1	0.872	0.06	0.036624		0.2	0.3	0.6
TMG2017_L_m	H5	bg_BG_1	bmin_1.14_bmax_1.16	MFD_GR	Set_2	TMG2017_L_mH5bg_BG_1bmin_1.14_bmax_1.16MFD_GRSet_2	sample_5	15.776	0.863	1	0.627	0.06	0.0324661		0.2	0.3	0.78
TMG2017_L_m	H5	bg_BG_1	bmin_1.14_bmax_1.16	MFD_GR	Set_2	TMG2017_L_mH5bg_BG_1bmin_1.14_bmax_1.16MFD_GRSet_2	sample_6	17.958	0.66	0.96	0.669	0.06	0.0254327		0.2	0.3	0.6
TMG2017_L_m	H5	bg_BG_1	bmin_1.14_bmax_1.16	MFD_GR	Set_2	TMG2017_L_mH5bg_BG_1bmin_1.14_bmax_1.16MFD_GRSet_2	sample_7	17.844	0.663	1	0.751	0.06	0.0298748		0.2	0.3	0.78
TMG2017_L_m	H5	bg_BG_1	bmin_1.14_bmax_1.16	MFD_GR	Set_2	TMG2017_L_mH5bg_BG_1bmin_1.14_bmax_1.16MFD_GRSet_2	sample_8	15.749	0.919	1	0.832	0.06	0.0458765		0.2	0.3	0.8
TMG2017_L_m	H5	bg_BG_1	bmin_1.14_bmax_1.16	MFD_GR	Set_2	TMG2017_L_mH5bg_BG_1bmin_1.14_bmax_1.16MFD_GRSet_2	sample_9	15.717	0.726	1	0.854	0.06	0.0372002		0.2	0.3	0.6
TMG2017_L_m	H5	bg_BG_1	bmin_1.14_bmax_1.16	MFD_GR	Set_2	TMG2017_L_mH5bg_BG_1bmin_1.14_bmax_1.16MFD_GRSet_2	sample_10	17.797	0.531	1	0.828	0.06	0.0263801		0.2	0.3	0.6
TMG2017_L_m	H5	bg_BG_2	bmin_1.14_bmax_1.16	MFD_GR	Set_2	TMG2017_L_mH5bg_BG_2bmin_1.14_bmax_1.16MFD_GRSet_2	sample_1	16.809	0.862	1	0.867	0.06	0.0448412		0.2	0.3	0.86
TMG2017_L_m	H5	bg_BG_2	bmin_1.14_bmax_1.16	MFD_GR	Set_2	TMG2017_L_mH5bg_BG_2bmin_1.14_bmax_1.16MFD_GRSet_2	sample_2	16.352	0.853	1	0.802	0.06	0.0410464		0.2	0.3	0.78
TMG2017_L_m	H5	bg_BG_2	bmin_1.14_bmax_1.16	MFD_GR	Set_2	TMG2017_L_mH5bg_BG_2bmin_1.14_bmax_1.16MFD_GRSet_2	sample_3	17.865	0.796	1	0.719	0.06	0.0343394		0.2	0.3	0.78
TMG2017_L_m	H5	bg_BG_2	bmin_1.14_bmax_1.16	MFD_GR	Set_2	TMG2017_L_mH5bg_BG_2bmin_1.14_bmax_1.16MFD_GRSet_2	sample_4	16.411	0.87	1	0.782	0.06	0.0408204		0.2	0.3	0.86
TMG2017_L_m	H5	bg_BG_2	bmin_1.14_bmax_1.16	MFD_GR	Set_2	TMG2017_L_mH5bg_BG_2bmin_1.14_bmax_1.16MFD_GRSet_2	sample_5	16.454	0.876	1	0.8	0.06	0.042048		0.2	0.3	0.78
TMG2017_L_m	H5	bg_BG_2	bmin_1.14_bmax_1.16	MFD_GR	Set_2	TMG2017_L_mH5bg_BG_2bmin_1.14_bmax_1.16MFD_GRSet_2	sample_6	17.069	0.883	1	0.851	0.06	0.045086		0.2	0.3	0.86
TMG2017_L_m	H5	bg_BG_2	bmin_1.14_bmax_1.16	MFD_GR	Set_2	TMG2017_L_mH5bg_BG_2bmin_1.14_bmax_1.16MFD_GRSet_2	sample_7	16.411	0.877	1	0.6	0.06	0.031572		0.2	0.3	0.86
TMG2017_L_m	H5	bg_BG_2	bmin_1.14_bmax_1.16	MFD_GR	Set_2	TMG2017_L_mH5bg_BG_2bmin_1.14_bmax_1.16MFD_GRSet_2	sample_8	17.908	0.877	1	0.777	0.06	0.0408857		0.2	0.3	0.86
TMG2017_L_m	H5	bg_BG_2	bmin_1.14_bmax_1.16	MFD_GR	Set_2	TMG2017_L_mH5bg_BG_2bmin_1.14_bmax_1.16MFD_GRSet_2	sample_9	17.149	0.879	1	0.861	0.06	0.0454091		0.2	0.3	0.86
TMG2017_L_m	H5	bg_BG_2	bmin_1.14_bmax_1.16	MFD_GR	Set_2	TMG2017_L_mH5bg_BG_2bmin_1.14_bmax_1.16MFD_GRSet_2	sample_10	17.976	0.857	1	0.821	0.06	0.0422158		0.2	0.3	0.8
TMG2017_L_m	H5	bg_BG_3	bmin_1.14_bmax_1.16	MFD_GR	Set_2	TMG2017_L_mH5bg_BG_3bmin_1.14_bmax_1.16MFD_GRSet_2	sample_1	16.809	0.664	1	0.811	0.06	0.0323102		0.2	0.3	0.6
TMG2017_L_m	H5	bg_BG_3	bmin_1.14_bmax_1.16	MFD_GR	Set_2	TMG2017_L_mH5bg_BG_3bmin_1.14_bmax_1.16MFD_GRSet_2	sample_2	17.111	0.441	1	0.858	0.06	0.0227027		0.2	0.3	0.6
TMG2017_L_m	H5	bg_BG_3	bmin_1.14_bmax_1.16	MFD_GR	Set_2	TMG2017_L_mH5bg_BG_3bmin_1.14_bmax_1.16MFD_GRSet_2	sample_3	17.132	0.799	1	0.543	0.06	0.0260314		0.2	0.3	0.78
TMG2017_L_m	H5	bg_BG_3	bmin_1.14_bmax_1.16	MFD_GR	Set_2	TMG2017_L_mH5bg_BG_3bmin_1.14_bmax_1.16MFD_GRSet_2	sample_4	17.232	0.563	1	0.825	0.06	0.0278685		0.2	0.3	0.6
TMG2017_L_m	H5	bg_BG_3	bmin_1.14_bmax_1.16	MFD_GR	Set_2	TMG2017_L_mH5bg_BG_3bmin_1.14_bmax_1.16MFD_GRSet_2	sample_5	15.724	0.839	1	0.789	0.06	0.0397183		0.2	0.3	0.78
TMG2017_L_m	H5	bg_BG_3	bmin_1.14_bmax_1.16	MFD_GR	Set_2	TMG2017_L_mH5bg_BG_3bmin_1.14_bmax_1.16MFD_GRSet_2	sample_6	17.809	0.74	1	0.801	0.06	0.0355644		0.2	0.3	0.78
TMG2017_L_m	H5	bg_BG_3	bmin_1.14_bmax_1.16	MFD_GR	Set_2	TMG2017_L_mH5bg_BG_3bmin_1.14_bmax_1.16MFD_GRSet_2	sample_7	17.906	0.741	1	0.811	0.06	0.0360571		0.2	0.3	0.78
TMG2017_L_m	H5	bg_BG_3	bmin_1.14_bmax_1.16	MFD_GR	Set_2	TMG2017_L_mH5bg_BG_3bmin_1.14_bmax_1.16MFD_GRSet_2	sample_8	16.534	0.883	1	0.568	0.06	0.0300926		0.2	0.3	0.8
TMG2017_L_m	H5	bg_BG_3	bmin_1.14_bmax_1.16	MFD_GR	Set_2	TMG2017_L_mH5bg_BG_3bmin_1.14_bmax_1.16MFD_GRSet_2	sample_9	17.165	0.757	0.697	0.84	0.06	0.0265925		0.2	0.3	0.6
TMG2017_L_m	H5	bg_BG_3	bmin_1.14_bmax_1.16	MFD_GR	Set_2	TMG2017_L_mH5bg_BG_3bmin_1.14_bmax_1.16MFD_GRSet_2	sample_10	17.17	0.905	1	0.696	0.06	0.0377928		0.2	0.3	0.8
TMG2017_L_m	H5	bg_BG_1	bmin_1.14_bmax_1.16	MFD_double_GR	Set_2	TMG2017_L_mH5bg_BG_1bmin_1.14_bmax_1.16MFD_double_GRSet_2	sample_1	16.809	0.88	1	0.874	0.24	0.184589		0.8	0.3	0.86
TMG2017_L_m	H5	bg_BG_1	bmin_1.14_bmax_1.16	MFD_double_GR	Set_2	TMG2017_L_mH5bg_BG_1bmin_1.14_bmax_1.16MFD_double_GRSet_2	sample_2	15.78	0.893	1	0.801	0.24	0.17167		0.8	0.3	0.78
TMG2017_L_m	H5	bg_BG_1	bmin_1.14_bmax_1.16	MFD_double_GR	Set_2	TMG2017_L_mH5bg_BG_1bmin_1.14_bmax_1.16MFD_double_GRSet_2	sample_3	16.456	0.874	0	0.666	0.24	0		0.8	0.3	0.86
TMG2017_L_m	H5	bg_BG_1	bmin_1.14_bmax_1.16	MFD_double_GR	Set_2	TMG2017_L_mH5bg_BG_1bmin_1.14_bmax_1.16MFD_double_GRSet_2	sample_4	15.771	0.877	1	0.84	0.24	0.176803		0.8	0.3	0.86
TMG2017_L_m	H5	bg_BG_1	bmin_1.14_bmax_1.16	MFD_double_GR	Set_2	TMG2017_L_mH5bg_BG_1bmin_1.14_bmax_1.16MFD_double_GRSet_2	sample_5	17.123	0.925	1	0.78	0.24	0.17316		0.8	0.3	0.8
TMG2017_L_m	H5	bg_BG_1	bmin_1.14_bmax_1.16	MFD_double_GR	Set_2	TMG2017_L_mH5bg_BG_1bmin_1.14_bmax_1.16MFD_double_GRSet_2	sample_6	17.848	0.909	1	0.496	0.24	0.108207		0.8	0.3	0.8
TMG2017_L_m	H5	bg_BG_1	bmin_1.14_bmax_1.16	MFD_double_GR	Set_2	TMG2017_L_mH5bg_BG_1bmin_1.14_bmax_1.16MFD_double_GRSet_2	sample_7	17.891	0.712	1	0.646	0.24	0.110388		0.8	0.3	0.78
TMG2017_L_m	H5	bg_BG_1	bmin_1.14_bmax_1.16	MFD_double_GR	Set_2	TMG2017_L_mH5bg_BG_1bmin_1.14_bmax_1.16MFD_double_GRSet_2	sample_8	17.188	0.869	1	0.777	0.24	0.162051		0.8	0.3	0.86
TMG2017_L_m	H5	bg_BG_1	bmin_1.14_bmax_1.16	MFD_double_GR	Set_2	TMG2017_L_mH5bg_BG_1bmin_1.14_bmax_1.16MFD_double_GRSet_2	sample_9	15.756	0.886	1	0.808	0.24	0.171813		0.8	0.3	0.86
TMG2017_L_m	H5	bg_BG_1	bmin_1.14_bmax_1.16	MFD_double_GR	Set_2	TMG2017_L_mH5bg_BG_1bmin_1.14_bmax_1.16MFD_double_GRSet_2	sample_10	16.41	0.925	1	0.806	0.24	0.178932		0.8	0.3	0.8
TMG2017_L_m	H5	bg_BG_2	bmin_1.14_bmax_1.16	MFD_double_GR	Set_2	TMG2017_L_mH5bg_BG_2bmin_1.14_bmax_1.16MFD_double_GRSet_2	sample_1	16.809	0.621	1	0.859	0.24	0.128025		0.8	0.3	0.6
TMG2017_L_m	H5	bg_BG_2	bmin_1.14_bmax_1.16	MFD_double_GR	Set_2	TMG2017_L_mH5bg_BG_2bmin_1.14_bmax_1.16MFD_double_GRSet_2	sample_2	16.419	0.386	1	0.799	0.24	0.0740194		0.8	0.3	0.24
TMG2017_L_m	H5	bg_BG_2	bmin_1.14_bmax_1.16	MFD_double_GR	Set_2	TMG2017_L_mH5bg_BG_2bmin_1.14_bmax_1.16MFD_double_GRSet_2	sample_3	15.716	0.831	1	0.822	0.24	0.16394		0.8	0.3	0.78
TMG2017_L_m	H5	bg_BG_2	bmin_1.14_bmax_1.16	MFD_double_GR	Set_2	TMG2017_L_mH5bg_BG_2bmin_1.14_bmax_1.16MFD_double_GRSet_2	sample_4	17.278	0.627	1	0.815	0.24	0.122641		0.8	0.3	0.6
TMG2017_L_m	H5	bg_BG_2	bmin_1.14_bmax_1.16	MFD_double_GR	Set_2	TMG2017_L_mH5bg_BG_2bmin_1.14_bmax_1.16MFD_double_GRSet_2	sample_5	15.773	0.65	0	0.726	0.24	0		0.8	0.3	0.6
TMG2017_L_m	H5	bg_BG_2	bmin_1.14_bmax_1.16	MFD_double_GR	Set_2	TMG2017_L_mH5bg_BG_2bmin_1.14_bmax_1.16MFD_double_GRSet_2	sample_6	17.201	0.511	0	0.798	0.24	0		0.8	0.3	0.6
TMG2017_L_m	H5	bg_BG_2	bmin_1.14_bmax_1.16	MFD_double_GR	Set_2	TMG2017_L_mH5bg_BG_2bmin_1.14_bmax_1.16MFD_double_GRSet_2	sample_7	16.476	0.703	1	0.681	0.24	0.114898		0.8	0.3	0.6
TMG2017_L_m	H5	bg_BG_2	bmin_1.14_bmax_1.16	MFD_double_GR	Set_2	TMG2017_L_mH5bg_BG_2bmin_1.14_bmax_1.16MFD_double_GRSet_2	sample_8	16.417	0.549	1	0.793	0.24	0.104486		0.8	0.3	0.6
TMG2017_L_m	H5	bg_BG_2	bmin_1.14_bmax_1.16	MFD_double_GR	Set_2	TMG2017_L_mH5bg_BG_2bmin_1.14_bmax_1.16MFD_double_GRSet_2	sample_9	16.437	0.181	1	0.843	0.24	0.0366199		0.8	0.3	0.24
TMG2017_L_m	H5	bg_BG_2	bmin_1.14_bmax_1.16	MFD_double_GR	Set_2	TMG2017_L_mH5bg_BG_2bmin_1.14_bmax_1.16MFD_double_GRSet_2	sample_10	15.775	0.916	1	0.807	0.24	0.177411		0.8	0.3	0.8
TMG2017_L_m	H5	bg_BG_3	bmin_1.14_bmax_1.16	MFD_double_GR	Set_2	TMG2017_L_mH5bg_BG_3bmin_1.14_bmax_1.16MFD_double_GRSet_2	sample_1	16.809	0.867	1	0.804	0.24	0.167296		0.8	0.3	0.86
TMG2017_L_m	H5	bg_BG_3	bmin_1.14_bmax_1.16	MFD_double_GR	Set_2	TMG2017_L_mH5bg_BG_3bmin_1.14_bmax_1.16MFD_double_GRSet_2	sample_2	17.921	0.856	1	0.86	0.24	0.176678		0.8	0.3	0.86
TMG2017_L_m	H5	bg_BG_3	bmin_1.14_bmax_1.16	MFD_double_GR	Set_2	TMG2017_L_mH5bg_BG_3bmin_1.14_bmax_1.16MFD_double_GRSet_2	sample_3	17.893	0.759	0	0.697	0.24	0		0.8	0.3	0.78
TMG2017_L_m	H5	bg_BG_3	bmin_1.14_bmax_1.16	MFD_double_GR	Set_2	TMG2017_L_mH5bg_BG_3bmin_1.14_bmax_1.16MFD_double_GRSet_2	sample_4	15.827	0.889	1	0.811	0.24	0.173035		0.8	0.3	0.86
TMG2017_L_m	H5	bg_BG_3	bmin_1.14_bmax_1.16	MFD_double_GR	Set_2	TMG2017_L_mH5bg_BG_3bmin_1.14_bmax_1.16MFD_double_GRSet_2	sample_5	16.474	0.769	1	0.722	0.24	0.133252		0.8	0.3	0.6
TMG2017_L_m	H5	bg_BG_3	bmin_1.14_bmax_1.16	MFD_double_GR	Set_2	TMG2017_L_mH5bg_BG_3bmin_1.14_bmax_1.16MFD_double_GRSet_2	sample_6	16.542	0.887	1	0.769	0.24	0.163705		0.8	0.3	0.8
TMG2017_L_m	H5	bg_BG_3	bmin_1.14_bmax_1.16	MFD_double_GR	Set_2	TMG2017_L_mH5bg_BG_3bmin_1.14_bmax_1.16MFD_double_GRSet_2	sample_7	16.419	0.886	1	0.808	0.24	0.171813		0.8	0.3	0.86
TMG2017_L_m	H5	bg_BG_3	bmin_1.14_bmax_1.16	MFD_double_GR	Set_2	TMG2017_L_mH5bg_BG_3bmin_1.14_bmax_1.16MFD_double_GRSet_2	sample_8	16.47	0.886	1	0.815	0.24	0.173302		0.8	0.3	0.86
TMG2017_L_m	H5	bg_BG_3	bmin_1.14_bmax_1.16	MFD_double_GR	Set_2	TMG2017_L_mH5bg_BG_3bmin_1.14_bmax_1.16MFD_double_GRSet_2	sample_9	16.473	0.869	1	0.829	0.24	0.172896		0.8	0.3	0.86
TMG2017_L_m	H5	bg_BG_3	bmin_1.14_bmax_1.16	MFD_double_GR	Set_2	TMG2017_L_mH5bg_BG_3bmin_1.14_bmax_1.16MFD_double_GRSet_2	sample_10	16.483	0.926	0	0.756	0.24	0		0.8	0.3	0.8
TMG2017_L_m	H6	bg_BG_1	bmin_1.14_bmax_1.16	MFD_GR	Set_1	TMG2017_L_mH6bg_BG_1bmin_1.14_bmax_1.16MFD_GRSet_1	sample_1	16.809	0.127	1	0.897	0.14	0.0159487		0.2	0.7	0.56
TMG2017_L_m	H6	bg_BG_1	bmin_1.14_bmax_1.16	MFD_GR	Set_1	TMG2017_L_mH6bg_BG_1bmin_1.14_bmax_1.16MFD_GRSet_1	sample_2	15.803	0.155	1	0.877	0.14	0.0190309		0.2	0.7	0.56
TMG2017_L_m	H6	bg_BG_1	bmin_1.14_bmax_1.16	MFD_GR	Set_1	TMG2017_L_mH6bg_BG_1bmin_1.14_bmax_1.16MFD_GRSet_1	sample_3	17.235	0.137	1	0.897	0.14	0.0172045		0.2	0.7	0.56
TMG2017_L_m	H6	bg_BG_1	bmin_1.14_bmax_1.16	MFD_GR	Set_1	TMG2017_L_mH6bg_BG_1bmin_1.14_bmax_1.16MFD_GRSet_1	sample_4	17.872	0.174	1	0.913	0.14	0.0222407		0.2	0.7	0.76
TMG2017_L_m	H6	bg_BG_1	bmin_1.14_bmax_1.16	MFD_GR	Set_1	TMG2017_L_mH6bg_BG_1bmin_1.14_bmax_1.16MFD_GRSet_1	sample_5	16.507	0.148	1	0.891	0.14	0.0184615		0.2	0.7	0.56
TMG2017_L_m	H6	bg_BG_1	bmin_1.14_bmax_1.16	MFD_GR	Set_1	TMG2017_L_mH6bg_BG_1bmin_1.14_bmax_1.16MFD_GRSet_1	sample_6	16.422	0.161	1	0.92	0.14	0.0207368		0.2	0.7	0.56
TMG2017_L_m	H6	bg_BG_1	bmin_1.14_bmax_1.16	MFD_GR	Set_1	TMG2017_L_mH6bg_BG_1bmin_1.14_bmax_1.16MFD_GRSet_1	sample_7	17.17	0.135	1	0.919	0.14	0.0173691		0.2	0.7	0.76
TMG2017_L_m	H6	bg_BG_1	bmin_1.14_bmax_1.16	MFD_GR	Set_1	TMG2017_L_mH6bg_BG_1bmin_1.14_bmax_1.16MFD_GRSet_1	sample_8	17.198	0.278	1	0.828	0.14	0.0322258		0.2	0.7	0.84
TMG2017_L_m	H6	bg_BG_1	bmin_1.14_bmax_1.16	MFD_GR	Set_1	TMG2017_L_mH6bg_BG_1bmin_1.14_bmax_1.16MFD_GRSet_1	sample_9	17.107	0.18	1	0.873	0.14	0.0219996		0.2	0.7	0.76
TMG2017_L_m	H6	bg_BG_1	bmin_1.14_bmax_1.16	MFD_GR	Set_1	TMG2017_L_mH6bg_BG_1bmin_1.14_bmax_1.16MFD_GRSet_1	sample_10	16.45	0.194	1	0.877	0.14	0.0238193		0.2	0.7	0.76
TMG2017_L_m	H6	bg_BG_2	bmin_1.14_bmax_1.16	MFD_GR	Set_1	TMG2017_L_mH6bg_BG_2bmin_1.14_bmax_1.16MFD_GRSet_1	sample_1	16.809	0.285	1	0.884	0.14	0.0352716		0.2	0.7	0.9
TMG2017_L_m	H6	bg_BG_2	bmin_1.14_bmax_1.16	MFD_GR	Set_1	TMG2017_L_mH6bg_BG_2bmin_1.14_bmax_1.16MFD_GRSet_1	sample_2	16.519	0.197	1	0.878	0.14	0.0242152		0.2	0.7	0.76
TMG2017_L_m	H6	bg_BG_2	bmin_1.14_bmax_1.16	MFD_GR	Set_1	TMG2017_L_mH6bg_BG_2bmin_1.14_bmax_1.16MFD_GRSet_1	sample_3	17.851	0.299	1	0.907	0.14	0.037967		0.2	0.7	0.9
TMG2017_L_m	H6	bg_BG_2	bmin_1.14_bmax_1.16	MFD_GR	Set_1	TMG2017_L_mH6bg_BG_2bmin_1.14_bmax_1.16MFD_GRSet_1	sample_4	17.827	0.158	1	0.785	0.14	0.0173642		0.2	0.7	0.76
TMG2017_L_m	H6	bg_BG_2	bmin_1.14_bmax_1.16	MFD_GR	Set_1	TMG2017_L_mH6bg_BG_2bmin_1.14_bmax_1.16MFD_GRSet_1	sample_5	15.803	0.463	1	0.808	0.14	0.0523746		0.2	0.7	0.92
TMG2017_L_m	H6	bg_BG_2	bmin_1.14_bmax_1.16	MFD_GR	Set_1	TMG2017_L_mH6bg_BG_2bmin_1.14_bmax_1.16MFD_GRSet_1	sample_6	16.497	0.337	1	0.871	0.14	0.0410938		0.2	0.7	0.84
TMG2017_L_m	H6	bg_BG_2	bmin_1.14_bmax_1.16	MFD_GR	Set_1	TMG2017_L_mH6bg_BG_2bmin_1.14_bmax_1.16MFD_GRSet_1	sample_7	16.414	0.492	1	0.885	0.14	0.0609588		0.2	0.7	0.98
TMG2017_L_m	H6	bg_BG_2	bmin_1.14_bmax_1.16	MFD_GR	Set_1	TMG2017_L_mH6bg_BG_2bmin_1.14_bmax_1.16MFD_GRSet_1	sample_8	15.749	0.327	1	0.898	0.14	0.0411104		0.2	0.7	0.84
TMG2017_L_m	H6	bg_BG_2	bmin_1.14_bmax_1.16	MFD_GR	Set_1	TMG2017_L_mH6bg_BG_2bmin_1.14_bmax_1.16MFD_GRSet_1	sample_9	17.866	0.166	1	0.9	0.14	0.020916		0.2	0.7	0.56
TMG2017_L_m	H6	bg_BG_2	bmin_1.14_bmax_1.16	MFD_GR	Set_1	TMG2017_L_mH6bg_BG_2bmin_1.14_bmax_1.16MFD_GRSet_1	sample_10	17.791	0.158	1	0.861	0.14	0.0190453		0.2	0.7	0.56
TMG2017_L_m	H6	bg_BG_3	bmin_1.14_bmax_1.16	MFD_GR	Set_1	TMG2017_L_mH6bg_BG_3bmin_1.14_bmax_1.16MFD_GRSet_1	sample_1	16.809	0.123	1	0.842	0.14	0.0144992		0.2	0.7	0.56
TMG2017_L_m	H6	bg_BG_3	bmin_1.14_bmax_1.16	MFD_GR	Set_1	TMG2017_L_mH6bg_BG_3bmin_1.14_bmax_1.16MFD_GRSet_1	sample_2	17.176	0.019	1	0.905	0.14	0.0024073		0.2	0.7	0.24
TMG2017_L_m	H6	bg_BG_3	bmin_1.14_bmax_1.16	MFD_GR	Set_1	TMG2017_L_mH6bg_BG_3bmin_1.14_bmax_1.16MFD_GRSet_1	sample_3	17.177	0.056	1	0.876	0.14	0.00686784		0.2	0.7	0.56
TMG2017_L_m	H6	bg_BG_3	bmin_1.14_bmax_1.16	MFD_GR	Set_1	TMG2017_L_mH6bg_BG_3bmin_1.14_bmax_1.16MFD_GRSet_1	sample_4	17.869	0.269	1	0.902	0.14	0.0339693		0.2	0.7	0.84
TMG2017_L_m	H6	bg_BG_3	bmin_1.14_bmax_1.16	MFD_GR	Set_1	TMG2017_L_mH6bg_BG_3bmin_1.14_bmax_1.16MFD_GRSet_1	sample_5	15.72	0.351	1	0.88	0.14	0.0432432		0.2	0.7	0.84
TMG2017_L_m	H6	bg_BG_3	bmin_1.14_bmax_1.16	MFD_GR	Set_1	TMG2017_L_mH6bg_BG_3bmin_1.14_bmax_1.16MFD_GRSet_1	sample_6	16.517	0.174	1	0.89	0.14	0.0216804		0.2	0.7	0.76
TMG2017_L_m	H6	bg_BG_3	bmin_1.14_bmax_1.16	MFD_GR	Set_1	TMG2017_L_mH6bg_BG_3bmin_1.14_bmax_1.16MFD_GRSet_1	sample_7	17.152	0.084	1	0.871	0.14	0.010243		0.2	0.7	0.56
TMG2017_L_m	H6	bg_BG_3	bmin_1.14_bmax_1.16	MFD_GR	Set_1	TMG2017_L_mH6bg_BG_3bmin_1.14_bmax_1.16MFD_GRSet_1	sample_8	15.785	0.116	1	0.854	0.14	0.013869		0.2	0.7	0.56
TMG2017_L_m	H6	bg_BG_3	bmin_1.14_bmax_1.16	MFD_GR	Set_1	TMG2017_L_mH6bg_BG_3bmin_1.14_bmax_1.16MFD_GRSet_1	sample_9	16.481	0.123	1	0.867	0.14	0.0149297		0.2	0.7	0.24
TMG2017_L_m	H6	bg_BG_3	bmin_1.14_bmax_1.16	MFD_GR	Set_1	TMG2017_L_mH6bg_BG_3bmin_1.14_bmax_1.16MFD_GRSet_1	sample_10	17.928	0.124	1	0.865	0.14	0.0150164		0.2	0.7	0.24
TMG2017_L_m	H6	bg_BG_1	bmin_1.14_bmax_1.16	MFD_double_GR	Set_1	TMG2017_L_mH6bg_BG_1bmin_1.14_bmax_1.16MFD_double_GRSet_1	sample_1	16.809	0.284	1	0.856	0.56	0.136138		0.8	0.7	0.9
TMG2017_L_m	H6	bg_BG_1	bmin_1.14_bmax_1.16	MFD_double_GR	Set_1	TMG2017_L_mH6bg_BG_1bmin_1.14_bmax_1.16MFD_double_GRSet_1	sample_2	17.166	0.29	1	0.843	0.56	0.136903		0.8	0.7	0.9
TMG2017_L_m	H6	bg_BG_1	bmin_1.14_bmax_1.16	MFD_double_GR	Set_1	TMG2017_L_mH6bg_BG_1bmin_1.14_bmax_1.16MFD_double_GRSet_1	sample_3	17.181	0.404	1	0.85	0.56	0.192304		0.8	0.7	0.92
TMG2017_L_m	H6	bg_BG_1	bmin_1.14_bmax_1.16	MFD_double_GR	Set_1	TMG2017_L_mH6bg_BG_1bmin_1.14_bmax_1.16MFD_double_GRSet_1	sample_4	17.173	0.331	1	0.887	0.56	0.164414		0.8	0.7	0.9
TMG2017_L_m	H6	bg_BG_1	bmin_1.14_bmax_1.16	MFD_double_GR	Set_1	TMG2017_L_mH6bg_BG_1bmin_1.14_bmax_1.16MFD_double_GRSet_1	sample_5	17.904	0.167	1	0.888	0.56	0.0830458		0.8	0.7	0.76
TMG2017_L_m	H6	bg_BG_1	bmin_1.14_bmax_1.16	MFD_double_GR	Set_1	TMG2017_L_mH6bg_BG_1bmin_1.14_bmax_1.16MFD_double_GRSet_1	sample_6	15.793	0.414	1	0.923	0.56	0.213988		0.8	0.7	0.84
TMG2017_L_m	H6	bg_BG_1	bmin_1.14_bmax_1.16	MFD_double_GR	Set_1	TMG2017_L_mH6bg_BG_1bmin_1.14_bmax_1.16MFD_double_GRSet_1	sample_7	16.436	0.164	1	0.895	0.56	0.0821968		0.8	0.7	0.76
TMG2017_L_m	H6	bg_BG_1	bmin_1.14_bmax_1.16	MFD_double_GR	Set_1	TMG2017_L_mH6bg_BG_1bmin_1.14_bmax_1.16MFD_double_GRSet_1	sample_8	17.962	0.301	1	0.898	0.56	0.151367		0.8	0.7	0.9
TMG2017_L_m	H6	bg_BG_1	bmin_1.14_bmax_1.16	MFD_double_GR	Set_1	TMG2017_L_mH6bg_BG_1bmin_1.14_bmax_1.16MFD_double_GRSet_1	sample_9	17.915	0.219	1	0.832	0.56	0.102036		0.8	0.7	0.84
TMG2017_L_m	H6	bg_BG_1	bmin_1.14_bmax_1.16	MFD_double_GR	Set_1	TMG2017_L_mH6bg_BG_1bmin_1.14_bmax_1.16MFD_double_GRSet_1	sample_10	15.783	0.345	1	0.837	0.56	0.161708		0.8	0.7	0.9
TMG2017_L_m	H6	bg_BG_2	bmin_1.14_bmax_1.16	MFD_double_GR	Set_1	TMG2017_L_mH6bg_BG_2bmin_1.14_bmax_1.16MFD_double_GRSet_1	sample_1	16.809	0.1	1	0.83	0.56	0.04648		0.8	0.7	0.56
TMG2017_L_m	H6	bg_BG_2	bmin_1.14_bmax_1.16	MFD_double_GR	Set_1	TMG2017_L_mH6bg_BG_2bmin_1.14_bmax_1.16MFD_double_GRSet_1	sample_2	17.872	0.084	1	0.877	0.56	0.0412541		0.8	0.7	0.56
TMG2017_L_m	H6	bg_BG_2	bmin_1.14_bmax_1.16	MFD_double_GR	Set_1	TMG2017_L_mH6bg_BG_2bmin_1.14_bmax_1.16MFD_double_GRSet_1	sample_3	17.92	0.045	1	0.939	0.56	0.0236628		0.8	0.7	0.56
TMG2017_L_m	H6	bg_BG_2	bmin_1.14_bmax_1.16	MFD_double_GR	Set_1	TMG2017_L_mH6bg_BG_2bmin_1.14_bmax_1.16MFD_double_GRSet_1	sample_4	17.125	0.101	1	0.858	0.56	0.0485285		0.8	0.7	0.56
TMG2017_L_m	H6	bg_BG_2	bmin_1.14_bmax_1.16	MFD_double_GR	Set_1	TMG2017_L_mH6bg_BG_2bmin_1.14_bmax_1.16MFD_double_GRSet_1	sample_5	17.221	0.101	1	0.882	0.56	0.0498859		0.8	0.7	0.56
TMG2017_L_m	H6	bg_BG_2	bmin_1.14_bmax_1.16	MFD_double_GR	Set_1	TMG2017_L_mH6bg_BG_2bmin_1.14_bmax_1.16MFD_double_GRSet_1	sample_6	17.196	0.105	1	0.818	0.56	0.0480984		0.8	0.7	0.76
TMG2017_L_m	H6	bg_BG_2	bmin_1.14_bmax_1.16	MFD_double_GR	Set_1	TMG2017_L_mH6bg_BG_2bmin_1.14_bmax_1.16MFD_double_GRSet_1	sample_7	15.808	0.018	1	0.829	0.56	0.00835632		0.8	0.7	0.24
TMG2017_L_m	H6	bg_BG_2	bmin_1.14_bmax_1.16	MFD_double_GR	Set_1	TMG2017_L_mH6bg_BG_2bmin_1.14_bmax_1.16MFD_double_GRSet_1	sample_8	17.916	0.178	1	0.907	0.56	0.0904098		0.8	0.7	0.84
TMG2017_L_m	H6	bg_BG_2	bmin_1.14_bmax_1.16	MFD_double_GR	Set_1	TMG2017_L_mH6bg_BG_2bmin_1.14_bmax_1.16MFD_double_GRSet_1	sample_9	15.743	0.023	1	0.906	0.56	0.0116693		0.8	0.7	0.24
TMG2017_L_m	H6	bg_BG_2	bmin_1.14_bmax_1.16	MFD_double_GR	Set_1	TMG2017_L_mH6bg_BG_2bmin_1.14_bmax_1.16MFD_double_GRSet_1	sample_10	15.832	0.153	1	0.842	0.56	0.0721426		0.8	0.7	0.56
TMG2017_L_m	H6	bg_BG_3	bmin_1.14_bmax_1.16	MFD_double_GR	Set_1	TMG2017_L_mH6bg_BG_3bmin_1.14_bmax_1.16MFD_double_GRSet_1	sample_1	16.809	0.258	1	0.811	0.56	0.117173		0.8	0.7	0.9
TMG2017_L_m	H6	bg_BG_3	bmin_1.14_bmax_1.16	MFD_double_GR	Set_1	TMG2017_L_mH6bg_BG_3bmin_1.14_bmax_1.16MFD_double_GRSet_1	sample_2	15.693	0.282	1	0.899	0.56	0.14197		0.8	0.7	0.9
TMG2017_L_m	H6	bg_BG_3	bmin_1.14_bmax_1.16	MFD_double_GR	Set_1	TMG2017_L_mH6bg_BG_3bmin_1.14_bmax_1.16MFD_double_GRSet_1	sample_3	17.89	0.244	1	0.889	0.56	0.121473		0.8	0.7	0.9
TMG2017_L_m	H6	bg_BG_3	bmin_1.14_bmax_1.16	MFD_double_GR	Set_1	TMG2017_L_mH6bg_BG_3bmin_1.14_bmax_1.16MFD_double_GRSet_1	sample_4	17.79	0.204	1	0.929	0.56	0.106129		0.8	0.7	0.9
TMG2017_L_m	H6	bg_BG_3	bmin_1.14_bmax_1.16	MFD_double_GR	Set_1	TMG2017_L_mH6bg_BG_3bmin_1.14_bmax_1.16MFD_double_GRSet_1	sample_5	17.852	0.256	1	0.872	0.56	0.12501		0.8	0.7	0.9
TMG2017_L_m	H6	bg_BG_3	bmin_1.14_bmax_1.16	MFD_double_GR	Set_1	TMG2017_L_mH6bg_BG_3bmin_1.14_bmax_1.16MFD_double_GRSet_1	sample_6	17.935	0.186	1	0.853	0.56	0.0888485		0.8	0.7	0.84
TMG2017_L_m	H6	bg_BG_3	bmin_1.14_bmax_1.16	MFD_double_GR	Set_1	TMG2017_L_mH6bg_BG_3bmin_1.14_bmax_1.16MFD_double_GRSet_1	sample_7	17.114	0.222	1	0.865	0.56	0.107537		0.8	0.7	0.84
TMG2017_L_m	H6	bg_BG_3	bmin_1.14_bmax_1.16	MFD_double_GR	Set_1	TMG2017_L_mH6bg_BG_3bmin_1.14_bmax_1.16MFD_double_GRSet_1	sample_8	17.938	0.222	1	0.797	0.56	0.099083		0.8	0.7	0.9
TMG2017_L_m	H6	bg_BG_3	bmin_1.14_bmax_1.16	MFD_double_GR	Set_1	TMG2017_L_mH6bg_BG_3bmin_1.14_bmax_1.16MFD_double_GRSet_1	sample_9	16.49	0.154	1	0.849	0.56	0.0732178		0.8	0.7	0.76
TMG2017_L_m	H6	bg_BG_3	bmin_1.14_bmax_1.16	MFD_double_GR	Set_1	TMG2017_L_mH6bg_BG_3bmin_1.14_bmax_1.16MFD_double_GRSet_1	sample_10	17.906	0.225	1	0.816	0.56	0.102816		0.8	0.7	0.9
TMG2017_L_m	H6	bg_BG_1	bmin_1.14_bmax_1.16	MFD_GR	Set_2	TMG2017_L_mH6bg_BG_1bmin_1.14_bmax_1.16MFD_GRSet_2	sample_1	16.809	0.686	1	0.887	0.06	0.0365089		0.2	0.3	0.56
TMG2017_L_m	H6	bg_BG_1	bmin_1.14_bmax_1.16	MFD_GR	Set_2	TMG2017_L_mH6bg_BG_1bmin_1.14_bmax_1.16MFD_GRSet_2	sample_2	17.142	0.683	1	0.846	0.06	0.0346691		0.2	0.3	0.56
TMG2017_L_m	H6	bg_BG_1	bmin_1.14_bmax_1.16	MFD_GR	Set_2	TMG2017_L_mH6bg_BG_1bmin_1.14_bmax_1.16MFD_GRSet_2	sample_3	16.434	0.557	1	0.795	0.06	0.0265689		0.2	0.3	0.56
TMG2017_L_m	H6	bg_BG_1	bmin_1.14_bmax_1.16	MFD_GR	Set_2	TMG2017_L_mH6bg_BG_1bmin_1.14_bmax_1.16MFD_GRSet_2	sample_4	16.398	0.776	1	0.796	0.06	0.0370618		0.2	0.3	0.56
TMG2017_L_m	H6	bg_BG_1	bmin_1.14_bmax_1.16	MFD_GR	Set_2	TMG2017_L_mH6bg_BG_1bmin_1.14_bmax_1.16MFD_GRSet_2	sample_5	15.808	0.537	1	0.449	0.06	0.0144668		0.2	0.3	0.24
TMG2017_L_m	H6	bg_BG_1	bmin_1.14_bmax_1.16	MFD_GR	Set_2	TMG2017_L_mH6bg_BG_1bmin_1.14_bmax_1.16MFD_GRSet_2	sample_6	17.87	0.663	1	0.815	0.06	0.0324207		0.2	0.3	0.56
TMG2017_L_m	H6	bg_BG_1	bmin_1.14_bmax_1.16	MFD_GR	Set_2	TMG2017_L_mH6bg_BG_1bmin_1.14_bmax_1.16MFD_GRSet_2	sample_7	16.517	0.747	1	0.604	0.06	0.0270713		0.2	0.3	0.56
TMG2017_L_m	H6	bg_BG_1	bmin_1.14_bmax_1.16	MFD_GR	Set_2	TMG2017_L_mH6bg_BG_1bmin_1.14_bmax_1.16MFD_GRSet_2	sample_8	17.82	0.896	1	0.907	0.06	0.0487603		0.2	0.3	0.84
TMG2017_L_m	H6	bg_BG_1	bmin_1.14_bmax_1.16	MFD_GR	Set_2	TMG2017_L_mH6bg_BG_1bmin_1.14_bmax_1.16MFD_GRSet_2	sample_9	17.811	0.647	1	0.736	0.06	0.0285715		0.2	0.3	0.56
TMG2017_L_m	H6	bg_BG_1	bmin_1.14_bmax_1.16	MFD_GR	Set_2	TMG2017_L_mH6bg_BG_1bmin_1.14_bmax_1.16MFD_GRSet_2	sample_10	17.171	0.923	1	0.722	0.06	0.0399844		0.2	0.3	0.84
TMG2017_L_m	H6	bg_BG_2	bmin_1.14_bmax_1.16	MFD_GR	Set_2	TMG2017_L_mH6bg_BG_2bmin_1.14_bmax_1.16MFD_GRSet_2	sample_1	16.809	0.896	1	0.879	0.06	0.047255		0.2	0.3	0.9
TMG2017_L_m	H6	bg_BG_2	bmin_1.14_bmax_1.16	MFD_GR	Set_2	TMG2017_L_mH6bg_BG_2bmin_1.14_bmax_1.16MFD_GRSet_2	sample_2	17.888	0.883	1	0.656	0.06	0.0347549		0.2	0.3	0.84
TMG2017_L_m	H6	bg_BG_2	bmin_1.14_bmax_1.16	MFD_GR	Set_2	TMG2017_L_mH6bg_BG_2bmin_1.14_bmax_1.16MFD_GRSet_2	sample_3	17.242	0.915	1	0.612	0.06	0.0335988		0.2	0.3	0.84
TMG2017_L_m	H6	bg_BG_2	bmin_1.14_bmax_1.16	MFD_GR	Set_2	TMG2017_L_mH6bg_BG_2bmin_1.14_bmax_1.16MFD_GRSet_2	sample_4	17.109	0.926	1	0.871	0.06	0.0483928		0.2	0.3	0.84
TMG2017_L_m	H6	bg_BG_2	bmin_1.14_bmax_1.16	MFD_GR	Set_2	TMG2017_L_mH6bg_BG_2bmin_1.14_bmax_1.16MFD_GRSet_2	sample_5	15.812	0.844	1	0.816	0.06	0.0413222		0.2	0.3	0.92
TMG2017_L_m	H6	bg_BG_2	bmin_1.14_bmax_1.16	MFD_GR	Set_2	TMG2017_L_mH6bg_BG_2bmin_1.14_bmax_1.16MFD_GRSet_2	sample_6	17.953	0.891	0.848	0.617	0.06	0.0279711		0.2	0.3	0.9
TMG2017_L_m	H6	bg_BG_2	bmin_1.14_bmax_1.16	MFD_GR	Set_2	TMG2017_L_mH6bg_BG_2bmin_1.14_bmax_1.16MFD_GRSet_2	sample_7	16.555	0.829	1	0.719	0.06	0.0357631		0.2	0.3	0.56
TMG2017_L_m	H6	bg_BG_2	bmin_1.14_bmax_1.16	MFD_GR	Set_2	TMG2017_L_mH6bg_BG_2bmin_1.14_bmax_1.16MFD_GRSet_2	sample_8	17.207	0.897	1	0.818	0.06	0.0440248		0.2	0.3	0.9
TMG2017_L_m	H6	bg_BG_2	bmin_1.14_bmax_1.16	MFD_GR	Set_2	TMG2017_L_mH6bg_BG_2bmin_1.14_bmax_1.16MFD_GRSet_2	sample_9	17.811	0.759	1	0.81	0.06	0.0368874		0.2	0.3	0.76
TMG2017_L_m	H6	bg_BG_2	bmin_1.14_bmax_1.16	MFD_GR	Set_2	TMG2017_L_mH6bg_BG_2bmin_1.14_bmax_1.16MFD_GRSet_2	sample_10	17.812	0.878	1	0.835	0.06	0.0439878		0.2	0.3	0.9
TMG2017_L_m	H6	bg_BG_3	bmin_1.14_bmax_1.16	MFD_GR	Set_2	TMG2017_L_mH6bg_BG_3bmin_1.14_bmax_1.16MFD_GRSet_2	sample_1	16.809	0.61	1	0.844	0.06	0.0308904		0.2	0.3	0.56
TMG2017_L_m	H6	bg_BG_3	bmin_1.14_bmax_1.16	MFD_GR	Set_2	TMG2017_L_mH6bg_BG_3bmin_1.14_bmax_1.16MFD_GRSet_2	sample_2	15.816	0.738	1	0.575	0.06	0.025461		0.2	0.3	0.56
TMG2017_L_m	H6	bg_BG_3	bmin_1.14_bmax_1.16	MFD_GR	Set_2	TMG2017_L_mH6bg_BG_3bmin_1.14_bmax_1.16MFD_GRSet_2	sample_3	16.421	0.725	1	0.768	0.06	0.033408		0.2	0.3	0.56
TMG2017_L_m	H6	bg_BG_3	bmin_1.14_bmax_1.16	MFD_GR	Set_2	TMG2017_L_mH6bg_BG_3bmin_1.14_bmax_1.16MFD_GRSet_2	sample_4	17.854	0.18	1	0.862	0.06	0.0093096		0.2	0.3	0.24
TMG2017_L_m	H6	bg_BG_3	bmin_1.14_bmax_1.16	MFD_GR	Set_2	TMG2017_L_mH6bg_BG_3bmin_1.14_bmax_1.16MFD_GRSet_2	sample_5	15.64	0.703	1	0.806	0.06	0.0339971		0.2	0.3	0.56
TMG2017_L_m	H6	bg_BG_3	bmin_1.14_bmax_1.16	MFD_GR	Set_2	TMG2017_L_mH6bg_BG_3bmin_1.14_bmax_1.16MFD_GRSet_2	sample_6	17.086	0.503	1	0.771	0.06	0.0232688		0.2	0.3	0.56
TMG2017_L_m	H6	bg_BG_3	bmin_1.14_bmax_1.16	MFD_GR	Set_2	TMG2017_L_mH6bg_BG_3bmin_1.14_bmax_1.16MFD_GRSet_2	sample_7	16.523	0.485	1	0.762	0.06	0.0221742		0.2	0.3	0.56
TMG2017_L_m	H6	bg_BG_3	bmin_1.14_bmax_1.16	MFD_GR	Set_2	TMG2017_L_mH6bg_BG_3bmin_1.14_bmax_1.16MFD_GRSet_2	sample_8	15.768	0.857	1	0.862	0.06	0.044324		0.2	0.3	0.76
TMG2017_L_m	H6	bg_BG_3	bmin_1.14_bmax_1.16	MFD_GR	Set_2	TMG2017_L_mH6bg_BG_3bmin_1.14_bmax_1.16MFD_GRSet_2	sample_9	16.446	0.747	1	0.781	0.06	0.0350044		0.2	0.3	0.76
TMG2017_L_m	H6	bg_BG_3	bmin_1.14_bmax_1.16	MFD_GR	Set_2	TMG2017_L_mH6bg_BG_3bmin_1.14_bmax_1.16MFD_GRSet_2	sample_10	16.348	0.309	1	0.801	0.06	0.0148505		0.2	0.3	0.24
TMG2017_L_m	H6	bg_BG_1	bmin_1.14_bmax_1.16	MFD_double_GR	Set_2	TMG2017_L_mH6bg_BG_1bmin_1.14_bmax_1.16MFD_double_GRSet_2	sample_1	16.809	0.886	1	0.87	0.24	0.184997		0.8	0.3	0.9
TMG2017_L_m	H6	bg_BG_1	bmin_1.14_bmax_1.16	MFD_double_GR	Set_2	TMG2017_L_mH6bg_BG_1bmin_1.14_bmax_1.16MFD_double_GRSet_2	sample_2	15.797	0.828	1	0.803	0.24	0.159572		0.8	0.3	0.92
TMG2017_L_m	H6	bg_BG_1	bmin_1.14_bmax_1.16	MFD_double_GR	Set_2	TMG2017_L_mH6bg_BG_1bmin_1.14_bmax_1.16MFD_double_GRSet_2	sample_3	17.875	0.872	1	0.765	0.24	0.160099		0.8	0.3	0.9
TMG2017_L_m	H6	bg_BG_1	bmin_1.14_bmax_1.16	MFD_double_GR	Set_2	TMG2017_L_mH6bg_BG_1bmin_1.14_bmax_1.16MFD_double_GRSet_2	sample_4	17.191	0.892	1	0.776	0.24	0.166126		0.8	0.3	0.9
TMG2017_L_m	H6	bg_BG_1	bmin_1.14_bmax_1.16	MFD_double_GR	Set_2	TMG2017_L_mH6bg_BG_1bmin_1.14_bmax_1.16MFD_double_GRSet_2	sample_5	17.182	0.887	1	0.448	0.24	0.0953702		0.8	0.3	0.9
TMG2017_L_m	H6	bg_BG_1	bmin_1.14_bmax_1.16	MFD_double_GR	Set_2	TMG2017_L_mH6bg_BG_1bmin_1.14_bmax_1.16MFD_double_GRSet_2	sample_6	17.866	0.874	1	0.787	0.24	0.165081		0.8	0.3	0.92
TMG2017_L_m	H6	bg_BG_1	bmin_1.14_bmax_1.16	MFD_double_GR	Set_2	TMG2017_L_mH6bg_BG_1bmin_1.14_bmax_1.16MFD_double_GRSet_2	sample_7	16.462	0.888	1	0.701	0.24	0.149397		0.8	0.3	0.9
TMG2017_L_m	H6	bg_BG_1	bmin_1.14_bmax_1.16	MFD_double_GR	Set_2	TMG2017_L_mH6bg_BG_1bmin_1.14_bmax_1.16MFD_double_GRSet_2	sample_8	16.384	0.897	1	0.879	0.24	0.189231		0.8	0.3	0.9
TMG2017_L_m	H6	bg_BG_1	bmin_1.14_bmax_1.16	MFD_double_GR	Set_2	TMG2017_L_mH6bg_BG_1bmin_1.14_bmax_1.16MFD_double_GRSet_2	sample_9	15.819	0.894	0	0.687	0.24	0		0.8	0.3	0.76
TMG2017_L_m	H6	bg_BG_1	bmin_1.14_bmax_1.16	MFD_double_GR	Set_2	TMG2017_L_mH6bg_BG_1bmin_1.14_bmax_1.16MFD_double_GRSet_2	sample_10	17.089	0.892	1	0.658	0.24	0.140865		0.8	0.3	0.9
TMG2017_L_m	H6	bg_BG_2	bmin_1.14_bmax_1.16	MFD_double_GR	Set_2	TMG2017_L_mH6bg_BG_2bmin_1.14_bmax_1.16MFD_double_GRSet_2	sample_1	16.809	0.543	1	0.864	0.24	0.112596		0.8	0.3	0.56
TMG2017_L_m	H6	bg_BG_2	bmin_1.14_bmax_1.16	MFD_double_GR	Set_2	TMG2017_L_mH6bg_BG_2bmin_1.14_bmax_1.16MFD_double_GRSet_2	sample_2	17.808	0.874	1	0.404	0.24	0.084743		0.8	0.3	0.84
TMG2017_L_m	H6	bg_BG_2	bmin_1.14_bmax_1.16	MFD_double_GR	Set_2	TMG2017_L_mH6bg_BG_2bmin_1.14_bmax_1.16MFD_double_GRSet_2	sample_3	15.755	0.812	1	0.801	0.24	0.156099		0.8	0.3	0.56
TMG2017_L_m	H6	bg_BG_2	bmin_1.14_bmax_1.16	MFD_double_GR	Set_2	TMG2017_L_mH6bg_BG_2bmin_1.14_bmax_1.16MFD_double_GRSet_2	sample_4	16.462	0.796	1	0.865	0.24	0.16525		0.8	0.3	0.76
TMG2017_L_m	H6	bg_BG_2	bmin_1.14_bmax_1.16	MFD_double_GR	Set_2	TMG2017_L_mH6bg_BG_2bmin_1.14_bmax_1.16MFD_double_GRSet_2	sample_5	17.901	0.403	1	0.871	0.24	0.0842431		0.8	0.3	0.56
TMG2017_L_m	H6	bg_BG_2	bmin_1.14_bmax_1.16	MFD_double_GR	Set_2	TMG2017_L_mH6bg_BG_2bmin_1.14_bmax_1.16MFD_double_GRSet_2	sample_6	17.196	0.238	1	0.351	0.24	0.0200491		0.8	0.3	0.24
TMG2017_L_m	H6	bg_BG_2	bmin_1.14_bmax_1.16	MFD_double_GR	Set_2	TMG2017_L_mH6bg_BG_2bmin_1.14_bmax_1.16MFD_double_GRSet_2	sample_7	16.446	0.329	1	0.644	0.24	0.0508502		0.8	0.3	0.24
TMG2017_L_m	H6	bg_BG_2	bmin_1.14_bmax_1.16	MFD_double_GR	Set_2	TMG2017_L_mH6bg_BG_2bmin_1.14_bmax_1.16MFD_double_GRSet_2	sample_8	16.439	0.734	1	0.793	0.24	0.139695		0.8	0.3	0.56
TMG2017_L_m	H6	bg_BG_2	bmin_1.14_bmax_1.16	MFD_double_GR	Set_2	TMG2017_L_mH6bg_BG_2bmin_1.14_bmax_1.16MFD_double_GRSet_2	sample_9	15.672	0.765	1	0.778	0.24	0.142841		0.8	0.3	0.56
TMG2017_L_m	H6	bg_BG_2	bmin_1.14_bmax_1.16	MFD_double_GR	Set_2	TMG2017_L_mH6bg_BG_2bmin_1.14_bmax_1.16MFD_double_GRSet_2	sample_10	16.512	0.258	1	0.78	0.24	0.0482976		0.8	0.3	0.24
TMG2017_L_m	H6	bg_BG_3	bmin_1.14_bmax_1.16	MFD_double_GR	Set_2	TMG2017_L_mH6bg_BG_3bmin_1.14_bmax_1.16MFD_double_GRSet_2	sample_1	16.809	0.894	0	0.806	0.24	0		0.8	0.3	0.9
TMG2017_L_m	H6	bg_BG_3	bmin_1.14_bmax_1.16	MFD_double_GR	Set_2	TMG2017_L_mH6bg_BG_3bmin_1.14_bmax_1.16MFD_double_GRSet_2	sample_2	17.803	0.869	0	0.291	0.24	0		0.8	0.3	0.92
TMG2017_L_m	H6	bg_BG_3	bmin_1.14_bmax_1.16	MFD_double_GR	Set_2	TMG2017_L_mH6bg_BG_3bmin_1.14_bmax_1.16MFD_double_GRSet_2	sample_3	15.772	0.857	1	0.775	0.24	0.159402		0.8	0.3	0.76
TMG2017_L_m	H6	bg_BG_3	bmin_1.14_bmax_1.16	MFD_double_GR	Set_2	TMG2017_L_mH6bg_BG_3bmin_1.14_bmax_1.16MFD_double_GRSet_2	sample_4	17.168	0.881	1	0.872	0.24	0.184376		0.8	0.3	0.9
TMG2017_L_m	H6	bg_BG_3	bmin_1.14_bmax_1.16	MFD_double_GR	Set_2	TMG2017_L_mH6bg_BG_3bmin_1.14_bmax_1.16MFD_double_GRSet_2	sample_5	15.788	0.844	1	0.76	0.24	0.153946		0.8	0.3	0.76
TMG2017_L_m	H6	bg_BG_3	bmin_1.14_bmax_1.16	MFD_double_GR	Set_2	TMG2017_L_mH6bg_BG_3bmin_1.14_bmax_1.16MFD_double_GRSet_2	sample_6	17.837	0.916	0	0.76	0.24	0		0.8	0.3	0.84
TMG2017_L_m	H6	bg_BG_3	bmin_1.14_bmax_1.16	MFD_double_GR	Set_2	TMG2017_L_mH6bg_BG_3bmin_1.14_bmax_1.16MFD_double_GRSet_2	sample_7	17.845	0.857	1	0.715	0.24	0.147061		0.8	0.3	0.9
TMG2017_L_m	H6	bg_BG_3	bmin_1.14_bmax_1.16	MFD_double_GR	Set_2	TMG2017_L_mH6bg_BG_3bmin_1.14_bmax_1.16MFD_double_GRSet_2	sample_8	16.452	0.895	1	0.843	0.24	0.181076		0.8	0.3	0.9
TMG2017_L_m	H6	bg_BG_3	bmin_1.14_bmax_1.16	MFD_double_GR	Set_2	TMG2017_L_mH6bg_BG_3bmin_1.14_bmax_1.16MFD_double_GRSet_2	sample_9	17.889	0.945	0	0.759	0.24	0		0.8	0.3	0.84
TMG2017_L_m	H6	bg_BG_3	bmin_1.14_bmax_1.16	MFD_double_GR	Set_2	TMG2017_L_mH6bg_BG_3bmin_1.14_bmax_1.16MFD_double_GRSet_2	sample_10	17.167	0.894	1	0.771	0.24	0.165426		0.8	0.3	0.9
													25.1363

## Sheet: Weigths_Figure12
Filter
Sum - Poids	BG	Data	MFD
	bg_BG_1				bg_BG_2				bg_BG_3				Total Result
	MFD_double_GR		MFD_GR		MFD_double_GR		MFD_GR		MFD_double_GR		MFD_GR
Model	Set_1	Set_2	Set_1	Set_2	Set_1	Set_2	Set_1	Set_2	Set_1	Set_2	Set_1	Set_2		CreeModel
H3	0.706402	0	0.0978216	0	0.37449	0	0.1983	0	1.06279	0	0.0812442	0.0439586	2.565	0.102044												#REF!
H4	2.15899	0.0858453	0.207174	0.173164	0.39191	0	0.647715	0.217679	1.4069	0	0.156404	0.0526901	5.49847	0.218746												#REF!
H5	1.44981	1.43761	0.210544	0.344508	0.517819	0.92204	0.415598	0.408264	1.4358	1.33198	0.200766	0.314731	8.98948	0.35763
H6	1.4241	1.41074	0.209037	0.326084	0.440488	1.00466	0.350317	0.393958	1.08326	0.991287	0.176725	0.272688	8.08334	0.321581
Total Result	5.73931	2.9342	0.724577	0.843755	1.72471	1.9267	1.61193	1.0199	4.98875	2.32326	0.61514	0.684067	25.1363
Sum - Poids		Data	BG
		bg_BG_1		bg_BG_2		bg_BG_3		Total Result
MFD	Model	Set_1	Set_2	Set_1	Set_2	Set_1	Set_2
MFD_double_GR	H3	0.706402	0	0.37449	0	1.06279	0	2.14368
	H4	2.15899	0.0858453	0.39191	0	1.4069	0	4.04364
	H5	1.44981	1.43761	0.517819	0.92204	1.4358	1.33198	7.09507
	H6	1.4241	1.41074	0.440488	1.00466	1.08326	0.991287	6.35454
MFD_GR	H3	0.0978216	0	0.1983	0	0.0812442	0.0439586	0.421325
	H4	0.207174	0.173164	0.647715	0.217679	0.156404	0.0526901	1.45483
	H5	0.210544	0.344508	0.415598	0.408264	0.200766	0.314731	1.89441
	H6	0.209037	0.326084	0.350317	0.393958	0.176725	0.272688	1.72881
Total Result		6.46388	3.77795	3.33664	2.94661	5.60389	3.00733	25.1363
BG		0.407452		0.249967		0.342581			BG
Sum - Poids	BG	Data	Sc
	bg_BG_1								bg_BG_2								bg_BG_3								Total Result
	Set_1				Set_2				Set_1				Set_2				Set_1				Set_2
MFD	H3	H4	H5	H6	H3	H4	H5	H6	H3	H4	H5	H6	H3	H4	H5	H6	H3	H4	H5	H6	H3	H4	H5	H6		MFD
MFD_double_GR	0.706402	2.15899	1.44981	1.4241	0	0.0858453	1.43761	1.41074	0.37449	0.39191	0.517819	0.440488	0	0	0.92204	1.00466	1.06279	1.4069	1.4358	1.08326	0	0	1.33198	0.991287	19.6369	0.781218
MFD_GR	0.0978216	0.207174	0.210544	0.209037	0	0.173164	0.344508	0.326084	0.1983	0.647715	0.415598	0.350317	0	0.217679	0.408264	0.393958	0.0812442	0.156404	0.200766	0.176725	0.0439586	0.0526901	0.314731	0.272688	5.49937	0.218782
Total Result	0.804224	2.36616	1.66036	1.63314	0	0.259009	1.78212	1.73682	0.57279	1.03962	0.933417	0.790805	0	0.217679	1.3303	1.39862	1.14403	1.5633	1.63657	1.25998	0.0439586	0.0526901	1.64671	1.26397	25.1363
Sum - Poids	BG	Data	Model
	bg_BG_1								bg_BG_2								bg_BG_3								Total Result
	H3		H4		H5		H6		H3		H4		H5		H6		H3		H4		H5		H6
Sc	MFD_double_GR	MFD_GR	MFD_double_GR	MFD_GR	MFD_double_GR	MFD_GR	MFD_double_GR	MFD_GR	MFD_double_GR	MFD_GR	MFD_double_GR	MFD_GR	MFD_double_GR	MFD_GR	MFD_double_GR	MFD_GR	MFD_double_GR	MFD_GR	MFD_double_GR	MFD_GR	MFD_double_GR	MFD_GR	MFD_double_GR	MFD_GR		Set
Set_1	0.706402	0.0978216	2.15899	0.207174	1.44981	0.210544	1.4241	0.209037	0.37449	0.1983	0.39191	0.647715	0.517819	0.415598	0.440488	0.350317	1.06279	0.0812442	1.4069	0.156404	1.4358	0.200766	1.08326	0.176725	15.4044	0.612835
Set_2	0	0	0.0858453	0.173164	1.43761	0.344508	1.41074	0.326084	0	0	0	0.217679	0.92204	0.408264	1.00466	0.393958	0	0.0439586	0	0.0526901	1.33198	0.314731	0.991287	0.272688	9.73189	0.387165
Total Result	0.706402	0.0978216	2.24483	0.380338	2.88743	0.555052	2.83484	0.53512	0.37449	0.1983	0.39191	0.865394	1.43986	0.823863	1.44515	0.744275	1.06279	0.125203	1.4069	0.209094	2.76778	0.515497	2.07454	0.449413	25.1363
Sum - Poids	BG	Data	MFD
	bg_BG_1				bg_BG_2				bg_BG_3				Total Result
	MFD_double_GR		MFD_GR		MFD_double_GR		MFD_GR		MFD_double_GR		MFD_GR
Model	Set_1	Set_2	Set_1	Set_2	Set_1	Set_2	Set_1	Set_2	Set_1	Set_2	Set_1	Set_2		CreeModel
H3	0.706402	0	0.0978216	0	0.37449	0	0.1983	0	1.06279	0	0.0812442	0.0439586	2.565	0.102044
H4	2.15899	0.0858453	0.207174	0.173164	0.39191	0	0.647715	0.217679	1.4069	0	0.156404	0.0526901	5.49847	0.218746
H5	1.44981	1.43761	0.210544	0.344508	0.517819	0.92204	0.415598	0.408264	1.4358	1.33198	0.200766	0.314731	8.98948	0.35763
H6	1.4241	1.41074	0.209037	0.326084	0.440488	1.00466	0.350317	0.393958	1.08326	0.991287	0.176725	0.272688	8.08334	0.321581
Total Result	5.73931	2.9342	0.724577	0.843755	1.72471	1.9267	1.61193	1.0199	4.98875	2.32326	0.61514	0.684067	25.1363

## Sheet: Scores_Figure12_2
Filter
	BG	NMS_score	Data	MFD	Model
	bg_BG_1
	0																		0.548			0.67			0.89			0.933			0.938			0.96			0.972			1
	Average - chi_score						Average - paleo_score						Average - NMS_score						Average - chi_score	Average - paleo_score	Average - NMS_score	Average - chi_score	Average - paleo_score	Average - NMS_score	Average - chi_score	Average - paleo_score	Average - NMS_score	Average - chi_score	Average - paleo_score	Average - NMS_score	Average - chi_score	Average - paleo_score	Average - NMS_score	Average - chi_score	Average - paleo_score	Average - NMS_score	Average - chi_score	Average - paleo_score	Average - NMS_score	Average - chi_score								Average - paleo_score
	MFD_double_GR				MFD_GR		MFD_double_GR				MFD_GR		MFD_double_GR				MFD_GR		MFD_double_GR	MFD_double_GR	MFD_double_GR	MFD_GR	MFD_GR	MFD_GR	MFD_GR	MFD_GR	MFD_GR	MFD_GR	MFD_GR	MFD_GR	MFD_GR	MFD_GR	MFD_GR	MFD_GR	MFD_GR	MFD_GR	MFD_GR	MFD_GR	MFD_GR	MFD_double_GR				MFD_GR				MFD_double_GR
Sc	H3	H4	H5	H6	H3	H4	H3	H4	H5	H6	H3	H4	H3	H4	H5	H6	H3	H4	H4	H4	H4	H4	H4	H4	H4	H4	H4	H4	H4	H4	H4	H4	H4	H5	H5	H5	H4	H4	H4	H3	H4	H5	H6	H3	H4	H5	H6	H3	H4
Set_1	0.35				0.2945	0.216	0.645167				0.72025	0.867	0				0	0																						0.35425	0.4327	0.3032	0.2919	0.143167	0.182889	0.1804	0.1689	0.89	0.891
Set_2	0.7721	0.836333	0.874	0.894	0.7402	0.8125	0.6029	0.614222	0.666	0.687	0.6314	0.48625	0	0	0	0	0	0	0.851	0.767	0.548	0.808	0.81	0.67	0.543	0.539	0.89	0.85	0.771	0.933	0.821	0.773	0.938	0.66	0.669	0.96	0.788	0.596	0.972			0.875111	0.879556		0.654	0.734667	0.7115
Total Result	0.613812	0.836333	0.874	0.894	0.612857	0.6932	0.61875	0.614222	0.666	0.687	0.656786	0.5624	0	0	0	0	0	0	0.851	0.767	0.548	0.808	0.81	0.67	0.543	0.539	0.89	0.85	0.771	0.933	0.821	0.773	0.938	0.66	0.669	0.96	0.788	0.596	0.972	0.35425	0.4327	0.574105	0.570263	0.143167	0.23	0.442947	0.4402	0.89	0.891
Avera scores of Creeping models
Average - NMS_score	BG	Data	MFD	Sc
	bg_BG_1															bg_BG_2															bg_BG_3													Total Result
	MFD_double_GR					MFD_GR										MFD_double_GR						MFD_GR									MFD_double_GR					MFD_GR
	Set_1		Set_2			Set_1		Set_2								Set_1				Set_2		Set_1		Set_2							Set_1			Set_2		Set_1		Set_2
Model	0	1	0	0.548	1	0	1	0	0.67	0.89	0.933	0.938	0.96	0.972	1	0	0.926	0.961	1	0	1	0	1	0	0.647	0.848	0.878	0.951	0.988	1	0	0.934	1	0	1	0	1	0	0.572	0.603	0.697	0.767	1
H3	0	1	0			0	1	0								0			1	0		0	1	0							0		1	0		0	1	0					1	0.266667
H4		1	0	0.548		0	1	0	0.67	0.89	0.933	0.938		0.972	1	0	0.926	0.961	1	0			1	0	0.647		0.878	0.951	0.988	1	0	0.934	1	0			1	0	0.572	0.603		0.767		0.59315
H5		1	0		1		1						0.96		1				1	0	1		1							1			1	0	1		1				0.697		1	0.955475
H6		1	0		1		1								1				1		1		1			0.848				1			1	0	1		1						1	0.957067
Total Result	0	1	0	0.548	1	0	1	0	0.67	0.89	0.933	0.938	0.96	0.972	1	0	0.926	0.961	1	0	1	0	1	0	0.647	0.848	0.878	0.951	0.988	1	0	0.934	1	0	1	0	1	0	0.572	0.603	0.697	0.767	1	0.69309
Average - paleo_score
	BG	NMS_score	Data	MFD
	bg_BG_1															bg_BG_2															bg_BG_3													Total Result
	0				0.548	0.67	0.89	0.933	0.938	0.96	0.972	1				0				0.647	0.848	0.878	0.926	0.951	0.961	0.988	1				0				0.572	0.603	0.697	0.767	0.934	1
	MFD_double_GR		MFD_GR		MFD_double_GR	MFD_GR	MFD_GR	MFD_GR	MFD_GR	MFD_GR	MFD_GR	MFD_double_GR		MFD_GR		MFD_double_GR		MFD_GR		MFD_GR	MFD_GR	MFD_GR	MFD_double_GR	MFD_GR	MFD_double_GR	MFD_GR	MFD_double_GR		MFD_GR		MFD_double_GR		MFD_GR		MFD_GR	MFD_GR	MFD_GR	MFD_GR	MFD_double_GR	MFD_double_GR		MFD_GR
Model	Set_1	Set_2	Set_1	Set_2	Set_2	Set_2	Set_2	Set_2	Set_2	Set_2	Set_2	Set_1	Set_2	Set_1	Set_2	Set_1	Set_2	Set_1	Set_2	Set_2	Set_2	Set_2	Set_1	Set_2	Set_1	Set_2	Set_1	Set_2	Set_1	Set_2	Set_1	Set_2	Set_1	Set_2	Set_2	Set_2	Set_2	Set_2	Set_1	Set_1	Set_2	Set_1	Set_2
H3	0.645167	0.6029	0.72025	0.6314								0.89		0.793667		0.542667	0.5174	0.7218	0.562								0.8725		0.7658		0.7594	0.43	0.7095	0.451625						0.8698		0.845333	0.6275	0.646825
H4		0.614222	0.867	0.48625	0.767	0.81	0.539	0.771	0.773		0.596	0.891		0.901111	0.801	0.296	0.5599		0.6055	0.763		0.53	0.942	0.836	0.46	0.622	0.879571		0.8287	0.6245	0.8855	0.5207		0.598143	0.706	0.713		0.587	0.835	0.845857		0.8693		0.726983
H5		0.666								0.669		0.8594	0.758667	0.8638	0.807111		0.762										0.877	0.802375	0.878	0.788		0.7265					0.84			0.854	0.80225	0.8676	0.744667	0.822175
H6		0.687										0.8709	0.743	0.8892	0.7557						0.617						0.8688	0.7151	0.8677	0.779556		0.654								0.858	0.789333	0.8752	0.7832	0.809975
Total Result	0.645167	0.614762	0.7496	0.589929	0.767	0.81	0.539	0.771	0.773	0.669	0.596	0.875676	0.750833	0.868629	0.7811	0.507429	0.558955	0.7218	0.56925	0.763	0.617	0.53	0.942	0.836	0.46	0.622	0.874355	0.753889	0.844943	0.756261	0.795429	0.522154	0.7095	0.52	0.706	0.713	0.84	0.587	0.835	0.855938	0.796714	0.866472	0.751857	0.75149
Average - sets	Sc
																		bg_BG_2																			bg_BG_3
				0.548	0.67	0.89	0.933	0.938	0.96	0.972	1							0					0.647	0.848	0.878	0.926	0.951	0.961	0.988	1							0						0.572	0.603	0.697	0.767	0.934	1
Set_2				Set_2	Set_2	Set_2	Set_2	Set_2	Set_2	Set_2	Set_1				Set_2			Set_1		Set_2			Set_2	Set_2	Set_2	Set_1	Set_2	Set_1	Set_2	Set_1				Set_2			Set_1		Set_2				Set_2	Set_2	Set_2	Set_2	Set_1	Set_1
H3	H4	H5	H6	H4	H4	H4	H4	H4	H5	H4	H3	H4	H5	H6	H4	H5	H6	H3	H4	H3	H4	H5	H4	H6	H4	H4	H4	H4	H4	H3	H4	H5	H6	H4	H5	H6	H3	H4	H3	H4	H5	H6	H4	H4	H5	H4	H4	H3	H4
0.7721	0.836333	0.874	0.894	0.851							0.35425	0.4327	0.3032	0.2919		0.875111	0.879556	0.152167	0.121	0.7925	0.6147	0.5805				0.086		0.225		0.1945	0.0852857	0.1077	0.0908		0.60175	0.5752	0.3808	0.3275	0.744	0.8306	0.8425	0.906					0.302	0.4342	0.386143
0.7402	0.8125				0.808	0.543	0.85	0.821	0.66	0.788	0.143167	0.182889	0.1804	0.1689	0.654	0.734667	0.7115	0.3168		0.8558	0.8055		0.893	0.891	0.883		0.509		0.949	0.3952	0.5616	0.3371	0.2882	0.7525	0.863	0.869667	0.137		0.6985	0.631571			0.874	0.742	0.757	0.458		0.114333	0.1295
0.75615	0.829	0.874	0.894	0.851	0.808	0.543	0.85	0.821	0.66	0.788	0.2276	0.314368	0.2418	0.2304	0.654	0.804889	0.791105	0.227	0.121	0.82415	0.6465	0.5805	0.893	0.891	0.883	0.086	0.509	0.225	0.949	0.306	0.365471	0.2224	0.1895	0.7525	0.746889	0.714684	0.272444	0.3275	0.723778	0.748647	0.8425	0.906	0.874	0.742	0.757	0.458	0.302	0.259727	0.235176
[truncated: 134 more columns]
